# Supplementary material for: Atom Economical Multi-Substituted Pyrrole Synthesis from Aziridine
Source: MDPI journal article supplement (doi:10.3390/molecules27206869), 2022-10-13

## Supporting Information

### Atom economical multi-substituted pyrrole synthesis from aziridine

Lingamurthy Macha, Ranjith Jala, Sang-Yun Na and Hyun-Joon Ha\*

Department of Chemistry, Hankuk University of Foreign Studies, Yongin 17035, Korea

E-mail: hjha@hufs.ac.kr (H.-J. Ha)

#### Table of Contents:

|                                                             |           |
|-------------------------------------------------------------|-----------|
| Copies of $^1\text{H}$ and $^{13}\text{C}$ NMR spectra..... | p S02-S25 |
|-------------------------------------------------------------|-----------|

**<sup>1</sup>H NMR spectrum of (R)-2-(azidomethyl)-1-(1-phenylethyl)-5-propyl-1H-pyrrole (2a):**

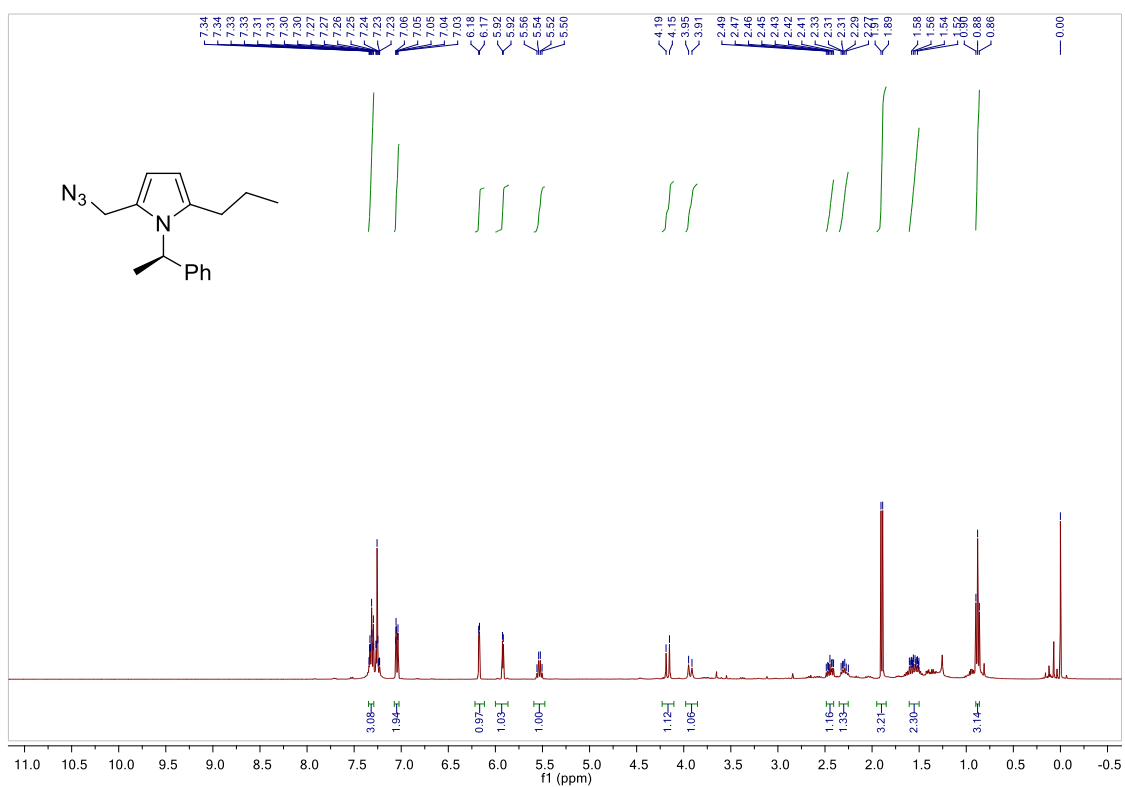

**<sup>13</sup>C NMR spectrum of (R)-2-(azidomethyl)-1-(1-phenylethyl)-5-propyl-1H-pyrrole (2a):**

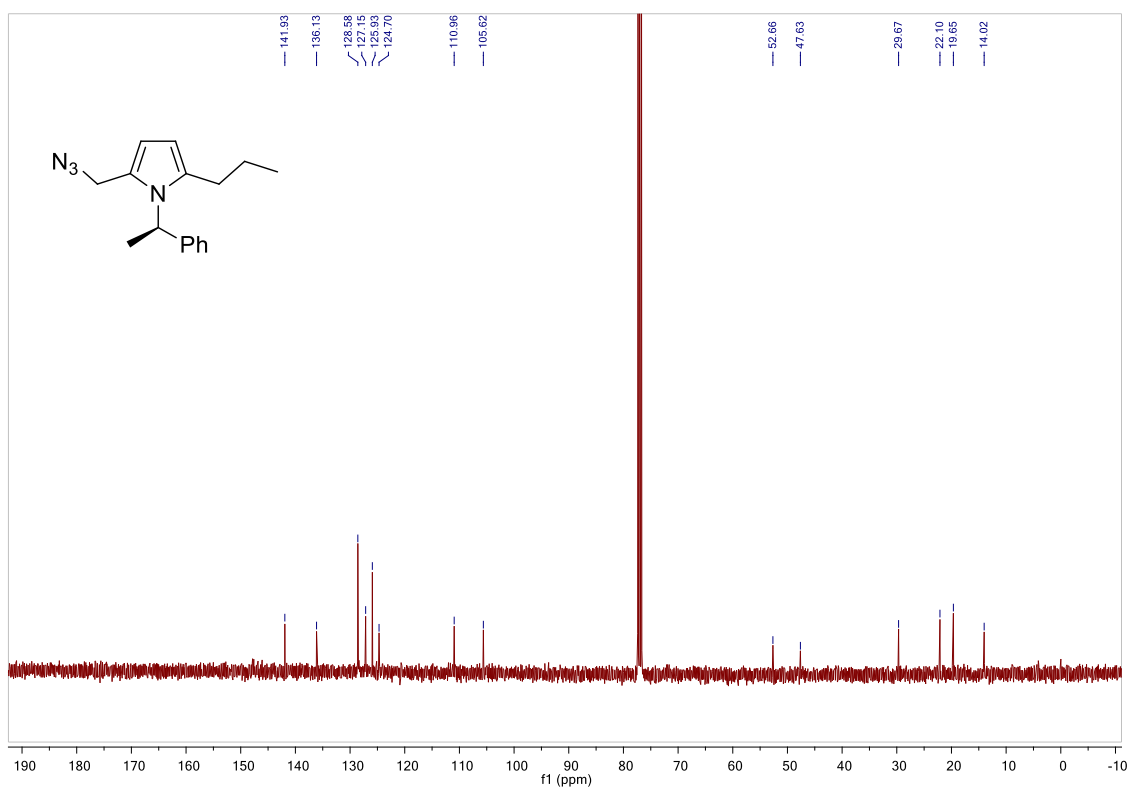

***<sup>1</sup>H NMR spectrum of 2-(azidomethyl)-1-benzyl-5-phenyl-1H-pyrrole (2b):***

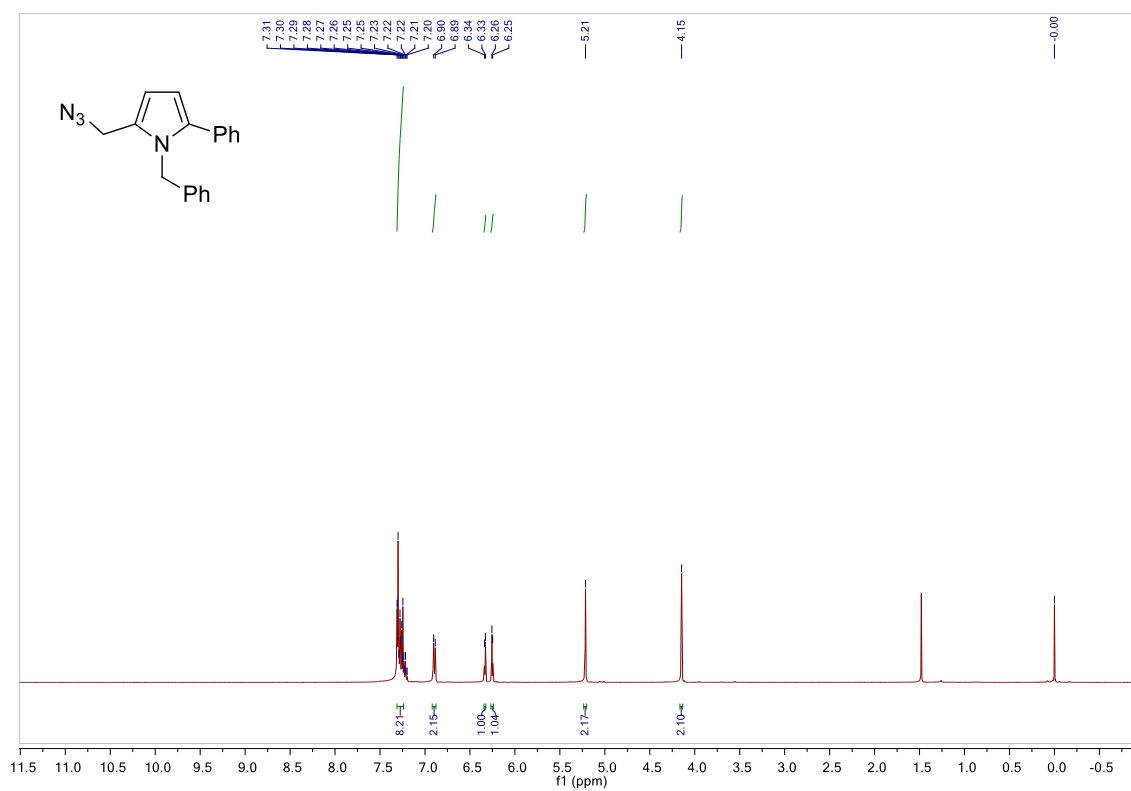

***<sup>13</sup>C NMR spectrum of 2-(azidomethyl)-1-benzyl-5-phenyl-1H-pyrrole (2b):***

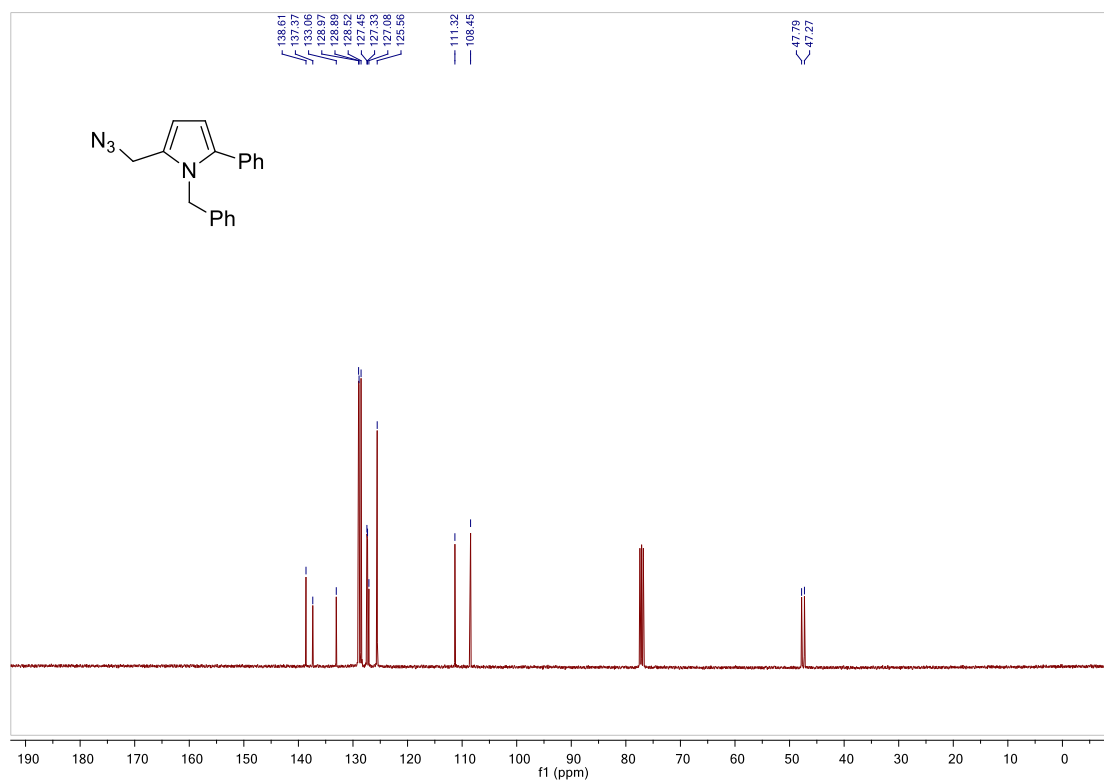

***<sup>1</sup>H NMR spectrum of 2-(azidomethyl)-1-benzyl-5-(2-methoxyphenyl)-1H-pyrrole (2e):***

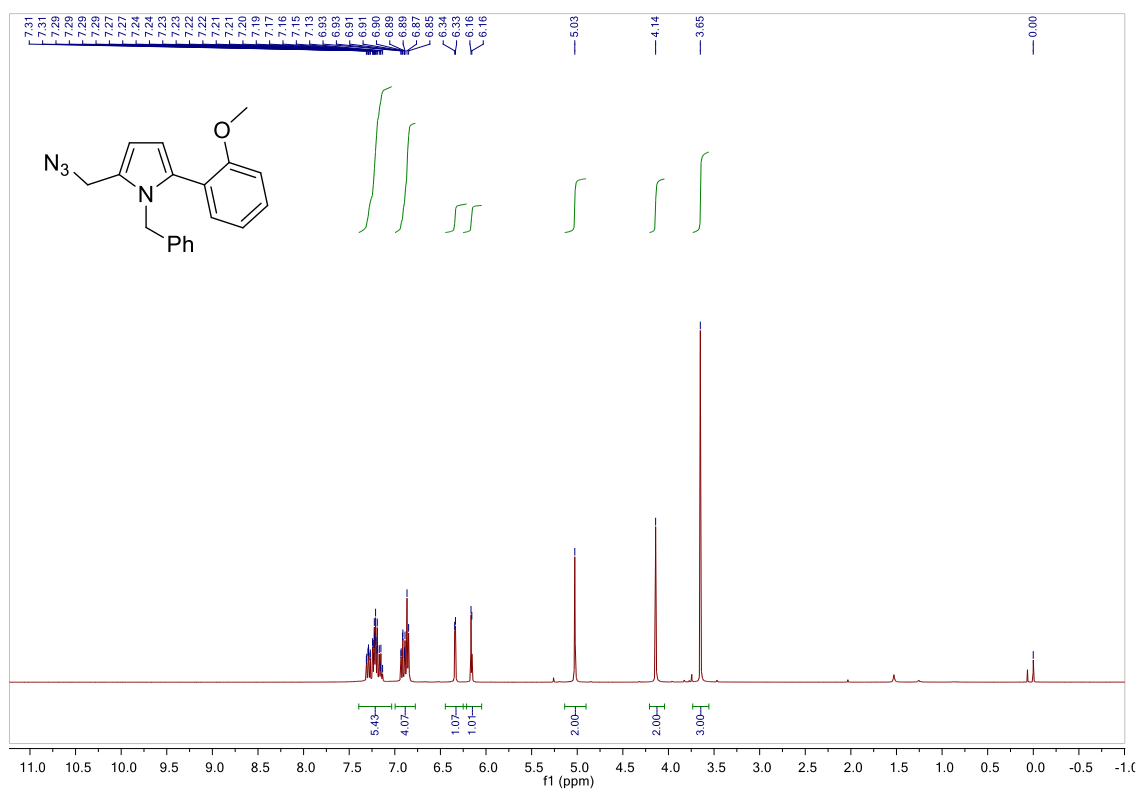

***<sup>13</sup>C NMR spectrum of 2-(azidomethyl)-1-benzyl-5-(2-methoxyphenyl)-1H-pyrrole (2e):***

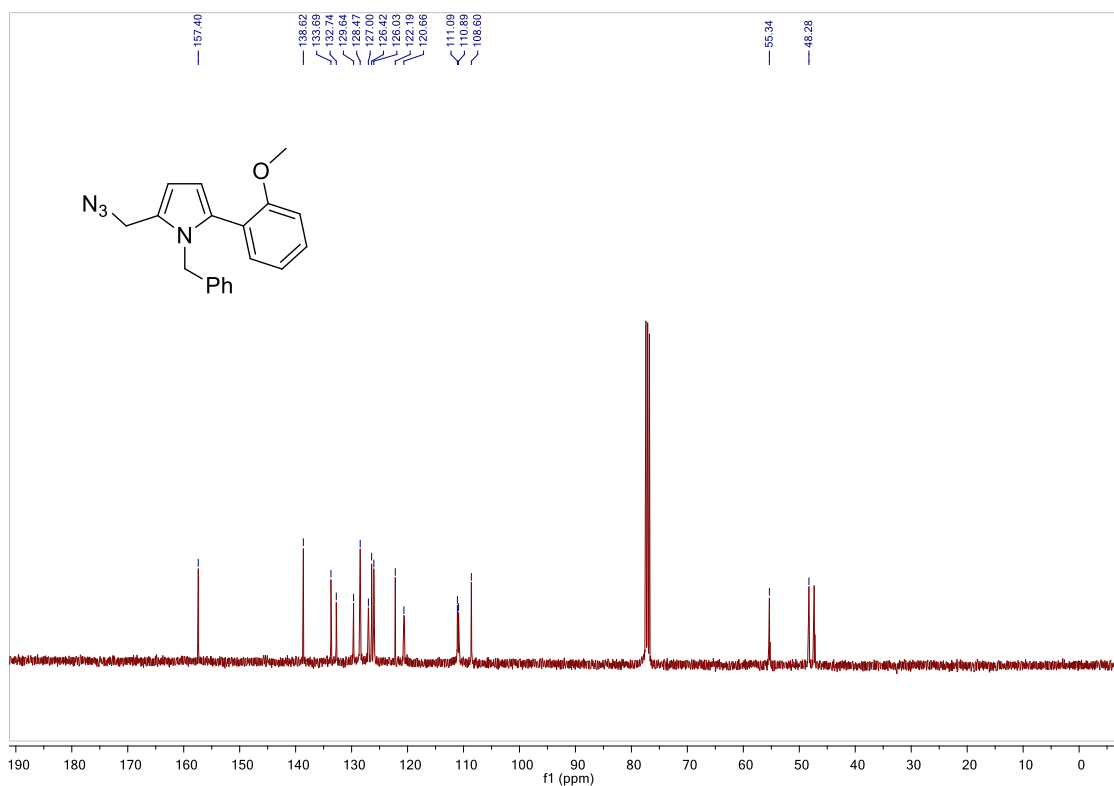

***<sup>1</sup>H NMR spectrum of 2-(azidomethyl)-1-benzyl-5-(4-methoxyphenyl)-1H-pyrrole (2f):***

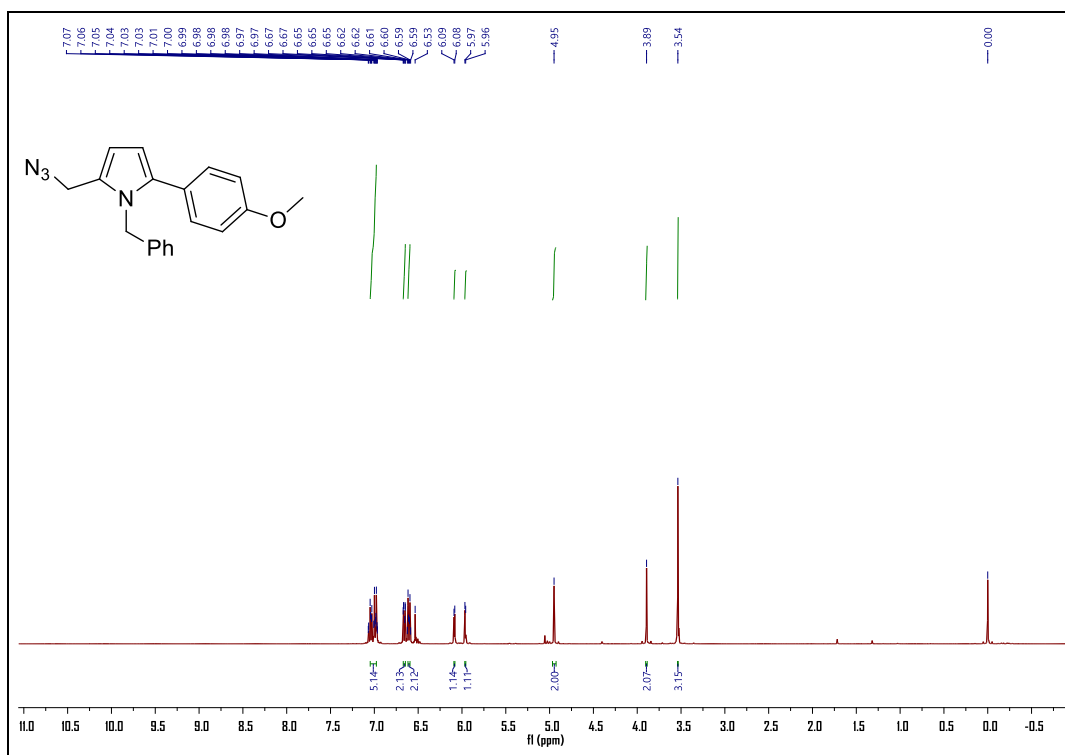

***<sup>13</sup>C NMR spectrum of 2-(azidomethyl)-1-benzyl-5-(4-methoxyphenyl)-1H-pyrrole (2f):***

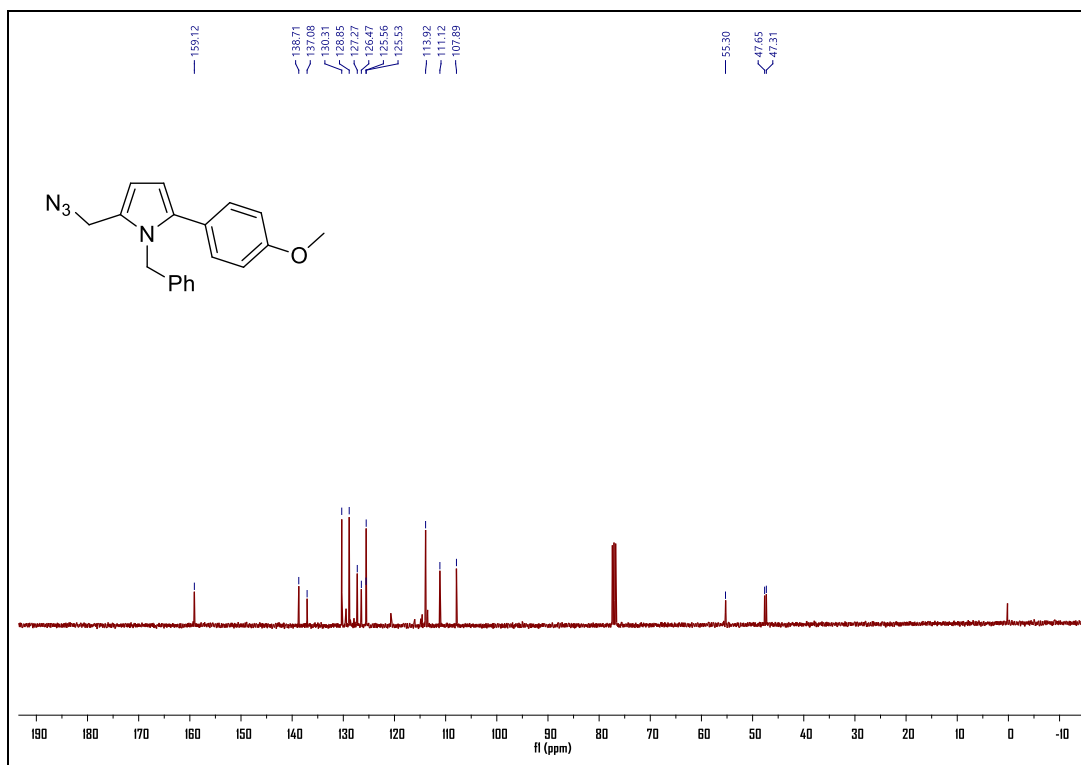

**<sup>1</sup>H NMR spectrum of 2-(azidomethyl)-1-benzyl-5-nonyl-1H-pyrrole (2g):**

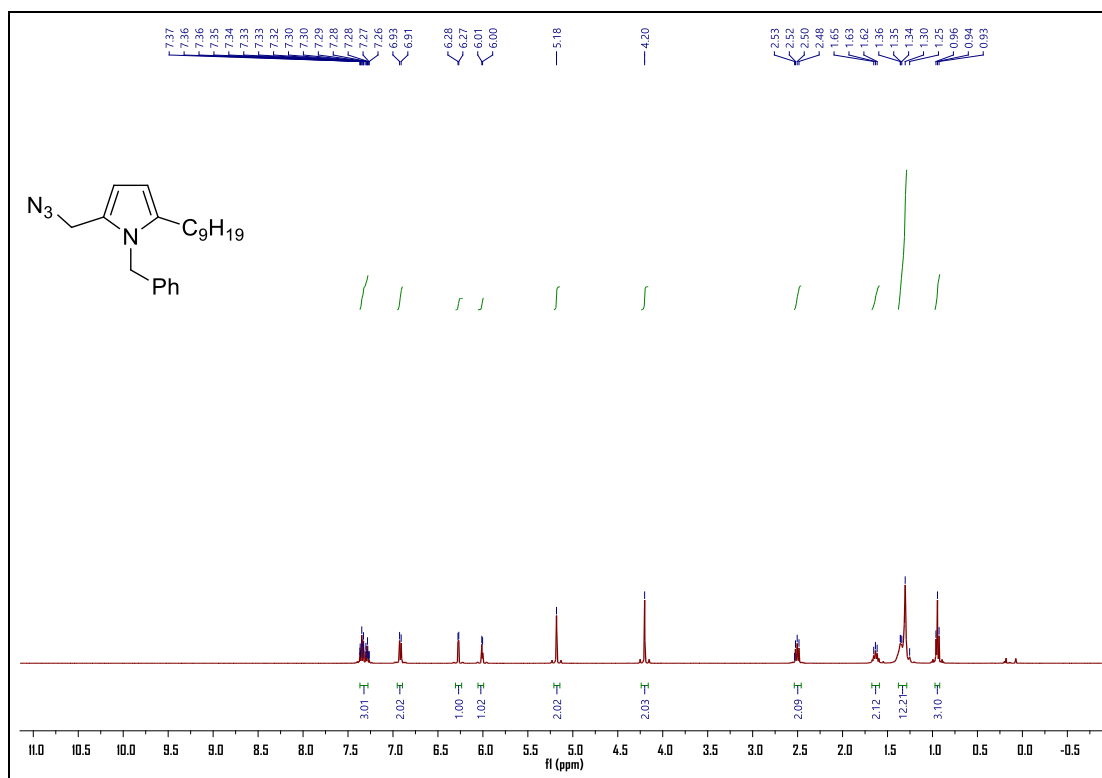

**<sup>13</sup>C NMR spectrum of 2-(azidomethyl)-1-benzyl-5-nonyl-1H-pyrrole (2g):**

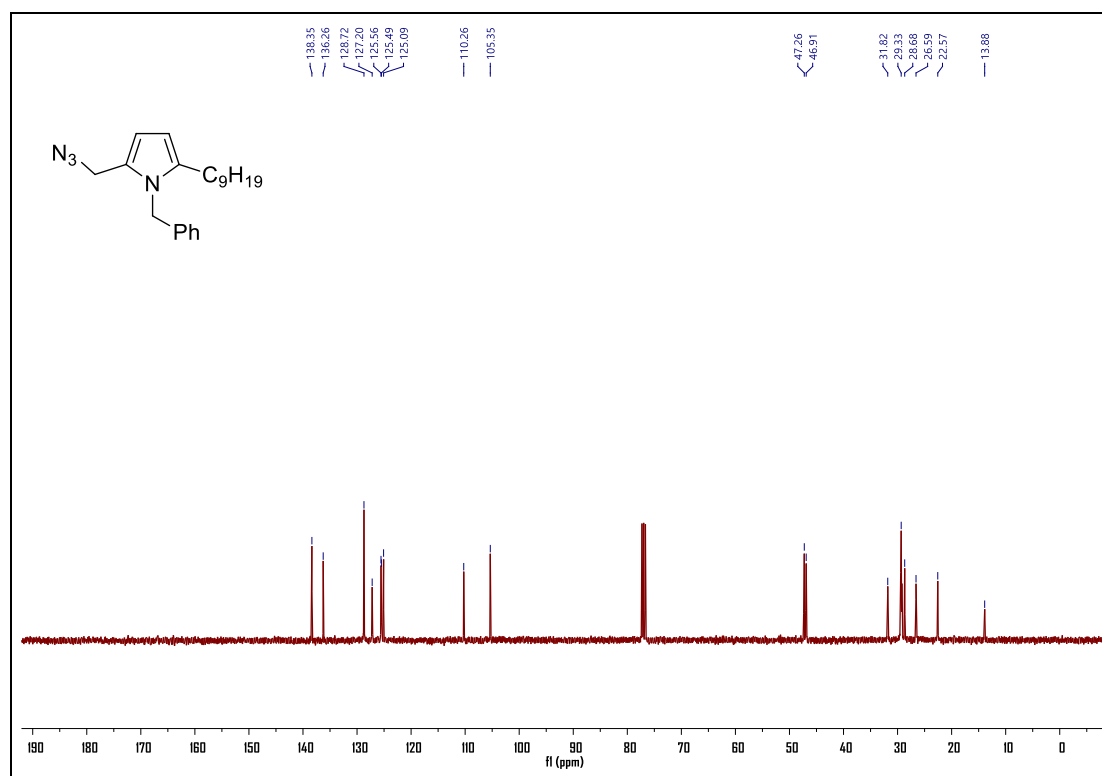

***<sup>1</sup>H NMR spectrum of (R)-2-(azidomethyl)-3-methyl-5-phenyl-1-(1-phenylethyl)-1H-pyrrole (2h):***

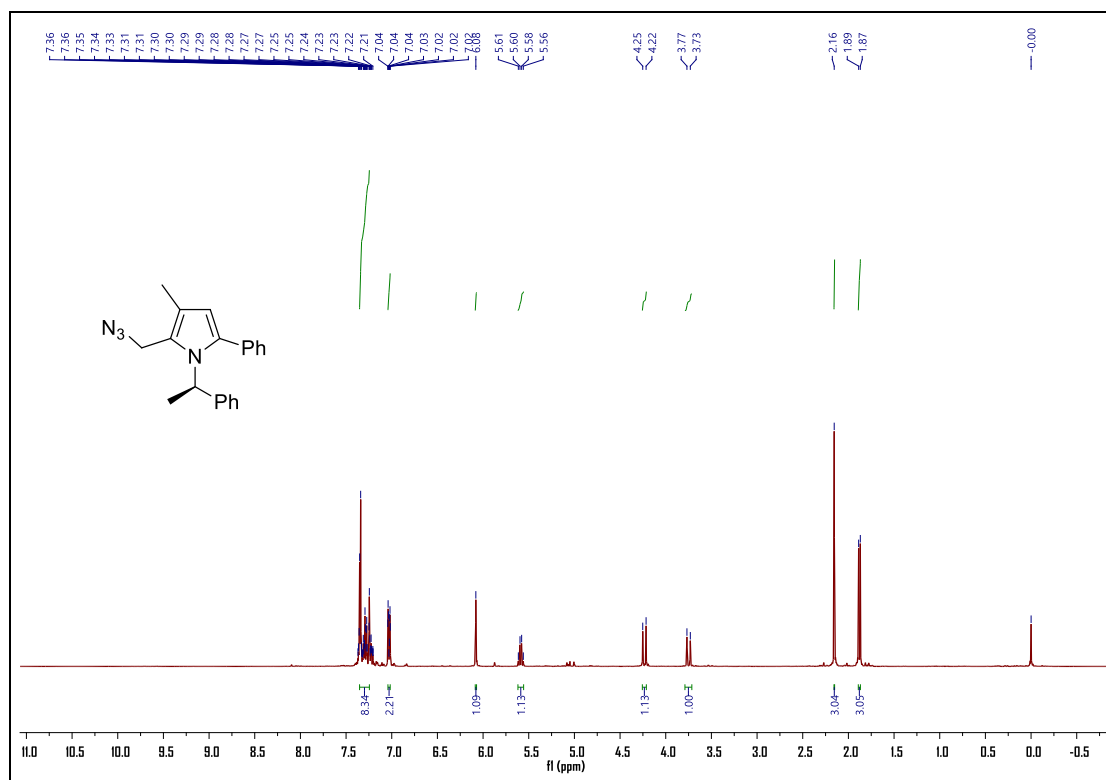

***<sup>13</sup>C NMR spectrum of (R)-2-(azidomethyl)-3-methyl-5-phenyl-1-(1-phenylethyl)-1H-pyrrole (2h):***

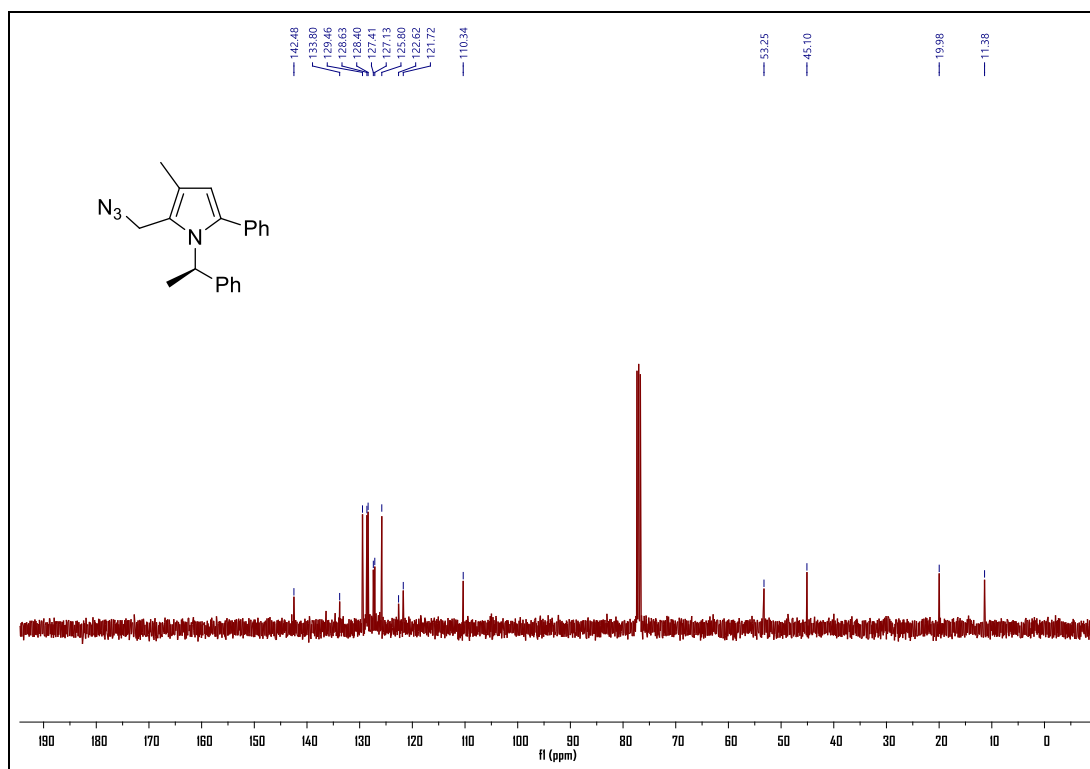

***<sup>1</sup>H NMR spectrum of (R)-2-(azidomethyl)-5-(((tert-butyldimethylsilyl)oxy)methyl)-3-methyl-1-(1-phenylethyl)-1H-pyrrole (2i):***

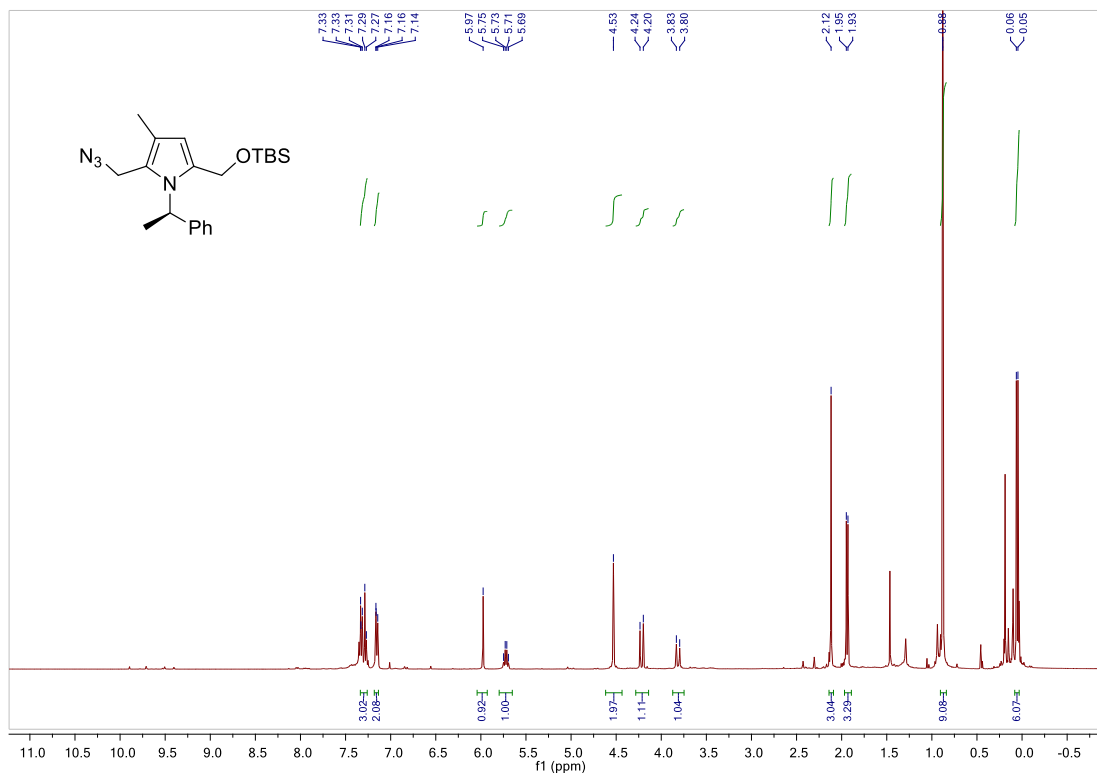

***<sup>13</sup>C NMR spectrum of (R)-2-(azidomethyl)-5-(((tert-butyldimethylsilyl)oxy)methyl)-3-methyl-1-(1-phenylethyl)-1H-pyrrole (2i):***

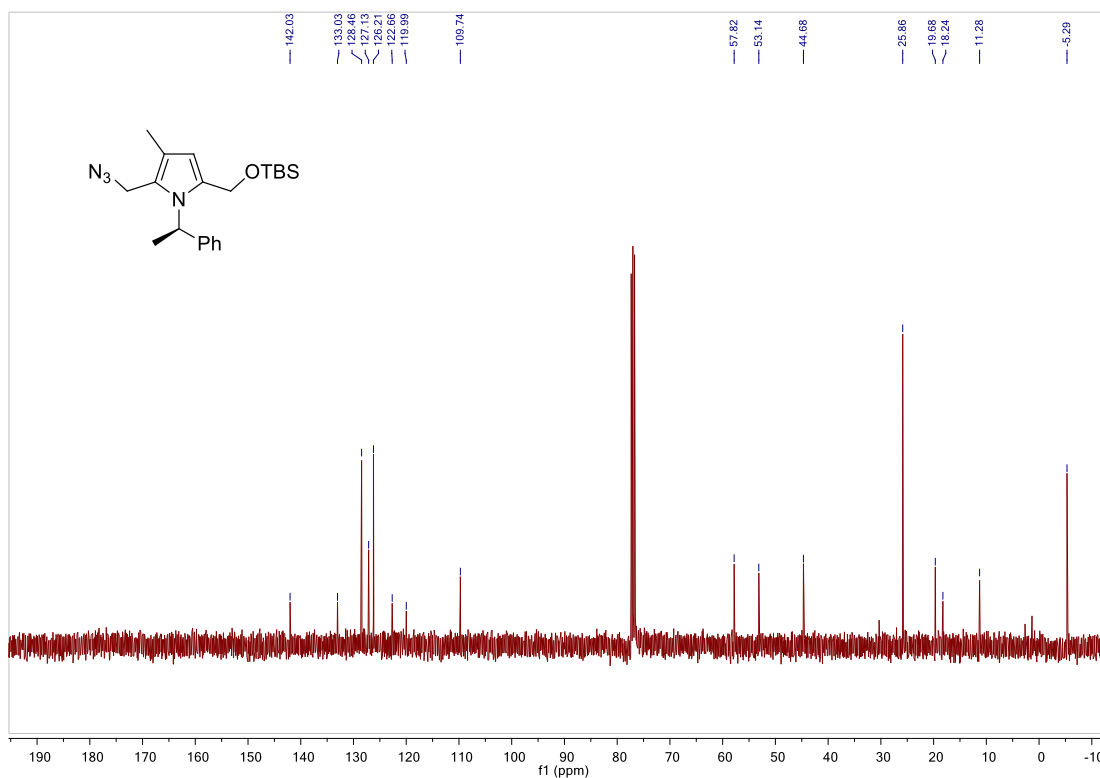

**<sup>1</sup>H NMR spectrum of (R)-2-(azidomethyl)-5-(((tert-butyl dimethylsilyl)oxy)methyl)-3-(4-methoxyphenyl)-1-(1-phenylethyl)-1H-pyrrole (2j):**

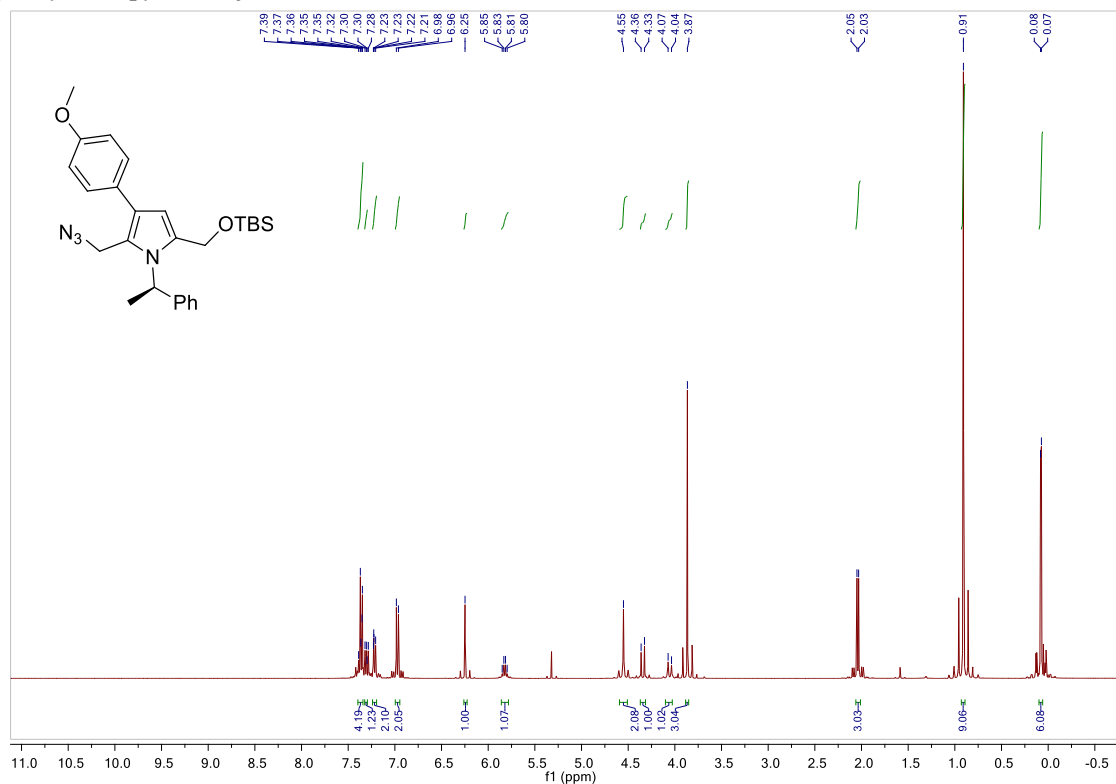

**<sup>13</sup>C NMR spectrum of (R)-2-(azidomethyl)-5-(((tert-butyl dimethylsilyl)oxy)methyl)-3-(4-methoxyphenyl)-1-(1-phenylethyl)-1H-pyrrole (2j):**

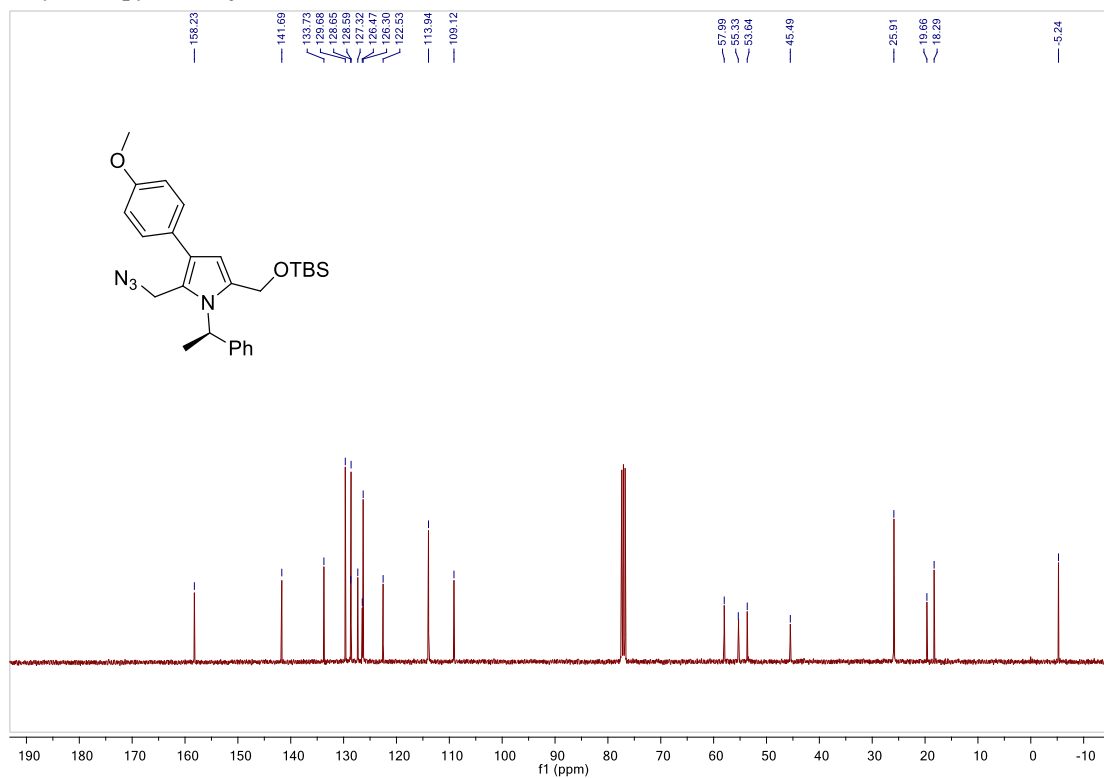

*<sup>1</sup>H NMR spectrum of (R)-5-(((5-(((tert-butyldimethylsilyl)oxy)methyl)-3-methyl-1-(1-phenylethyl)-1H-pyrrol-2-yl)methyl)thio)-1-phenyl-1H-tetrazole (2k):*

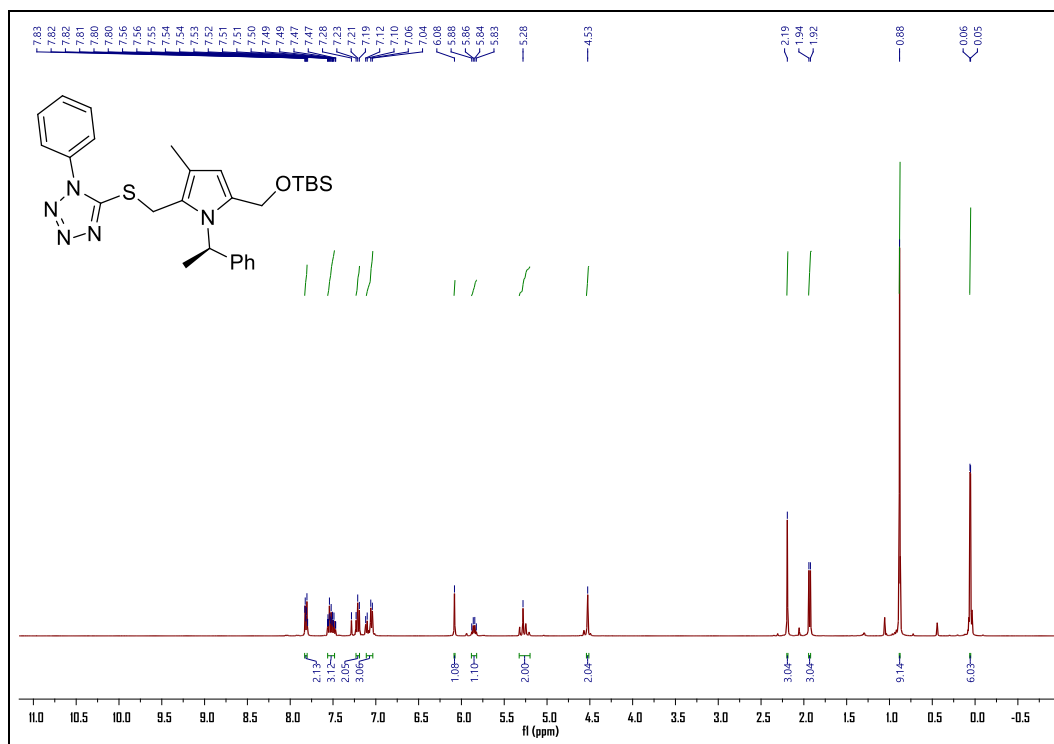

**<sup>13</sup>C NMR spectrum of (R)-5-(((5-(((tert-butyldimethylsilyl)oxy)methyl)-3-methyl-1-(1-phenylethyl)-1H-pyrrol-2-yl)methyl)thio)-1-phenyl-1H-tetrazole (2k):**

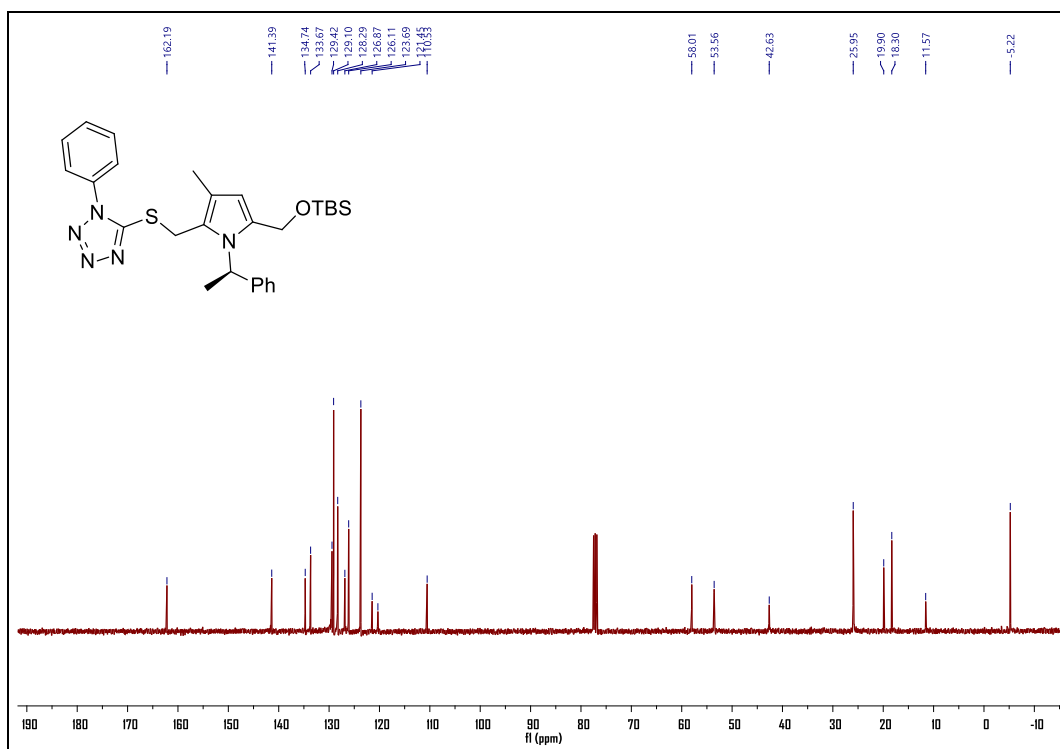

***<sup>1</sup>H NMR spectrum of 5-(((1-benzyl-5-nonyl-1H-pyrrol-2-yl)methyl)thio)-1-phenyl-1H-tetrazole (2l):***

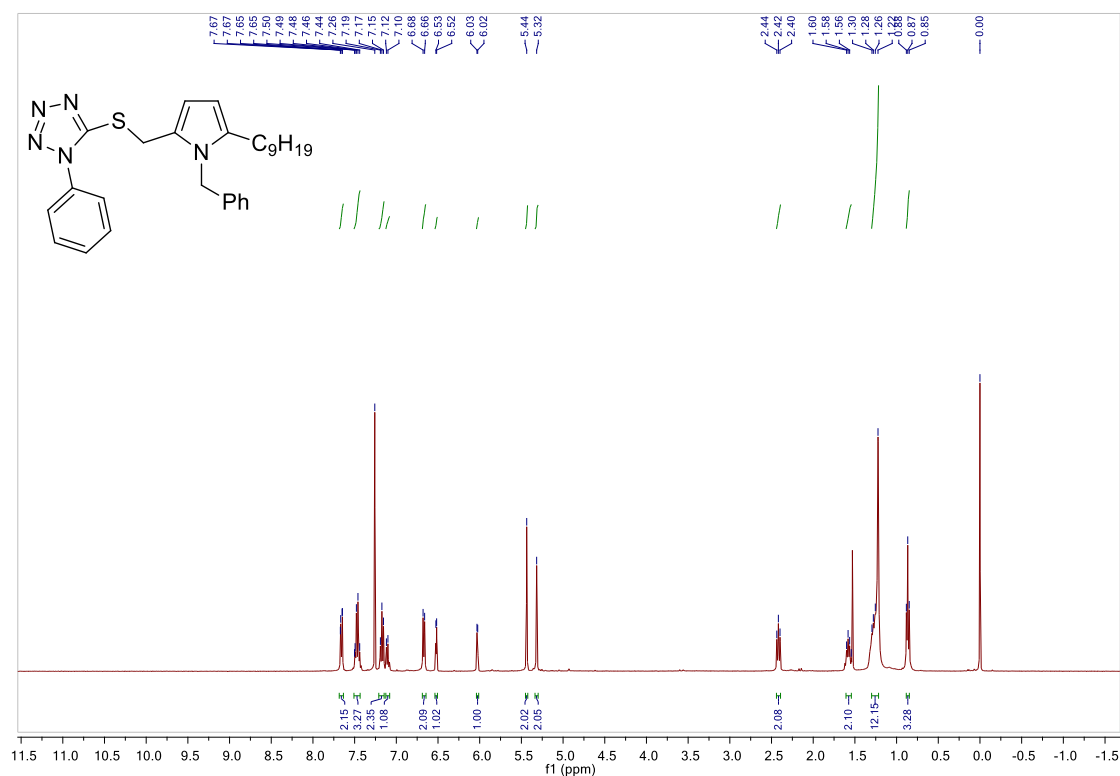

***<sup>13</sup>C NMR spectrum of 5-(((1-benzyl-5-nonyl-1H-pyrrol-2-yl)methyl)thio)-1-phenyl-1H-tetrazole (2l):***

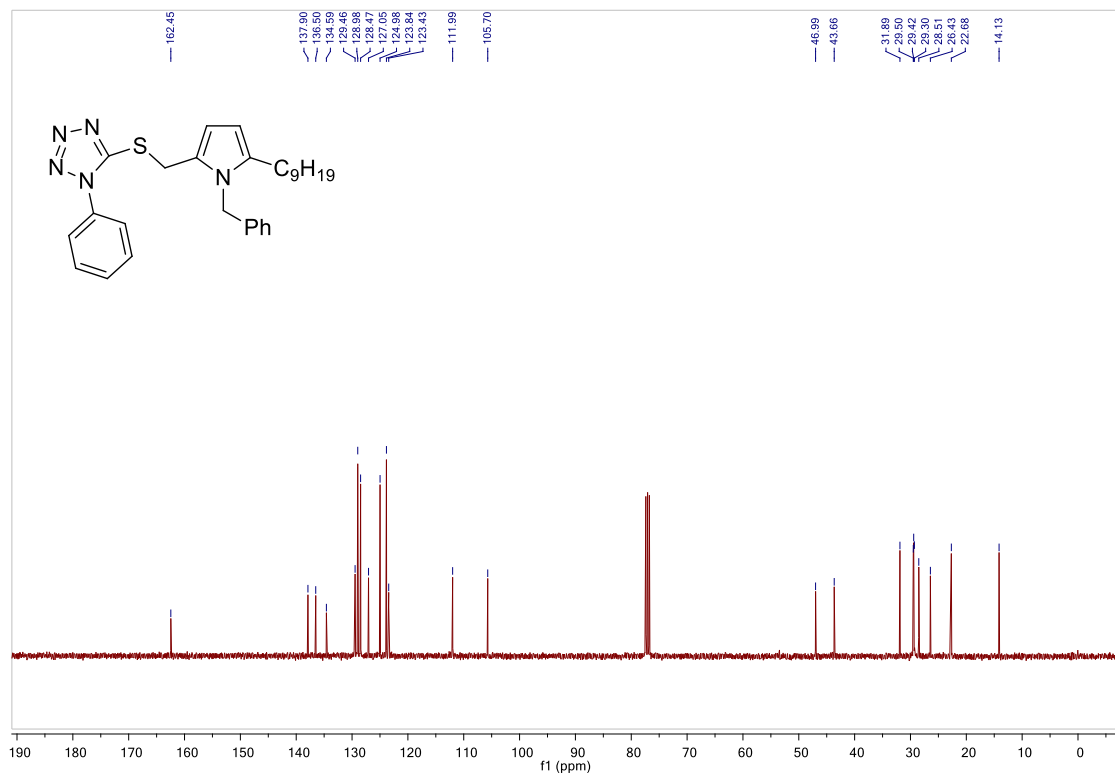

***<sup>1</sup>H NMR spectrum of 1-benzyl-2-(((4-methoxybenzyl)thio)methyl)-5-phenyl-1H-pyrrole (2m):***

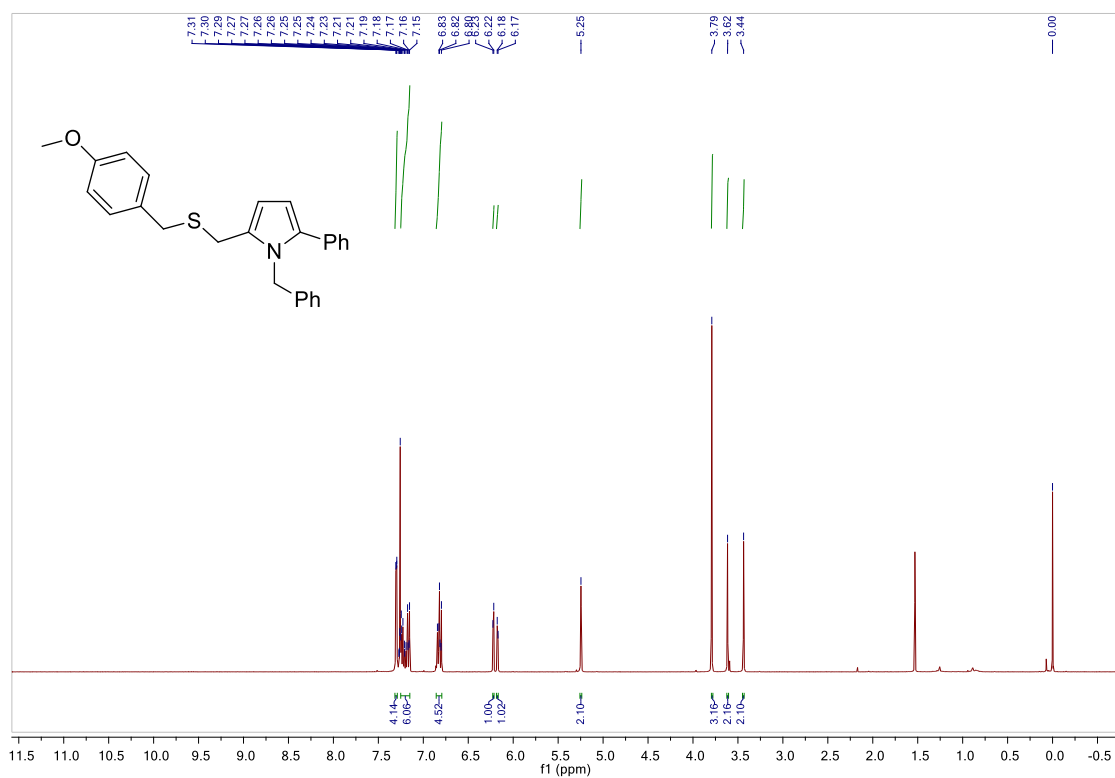

***<sup>13</sup>C NMR spectrum of 1-benzyl-2-(((4-methoxybenzyl)thio)methyl)-5-phenyl-1H-pyrrole (2m):***

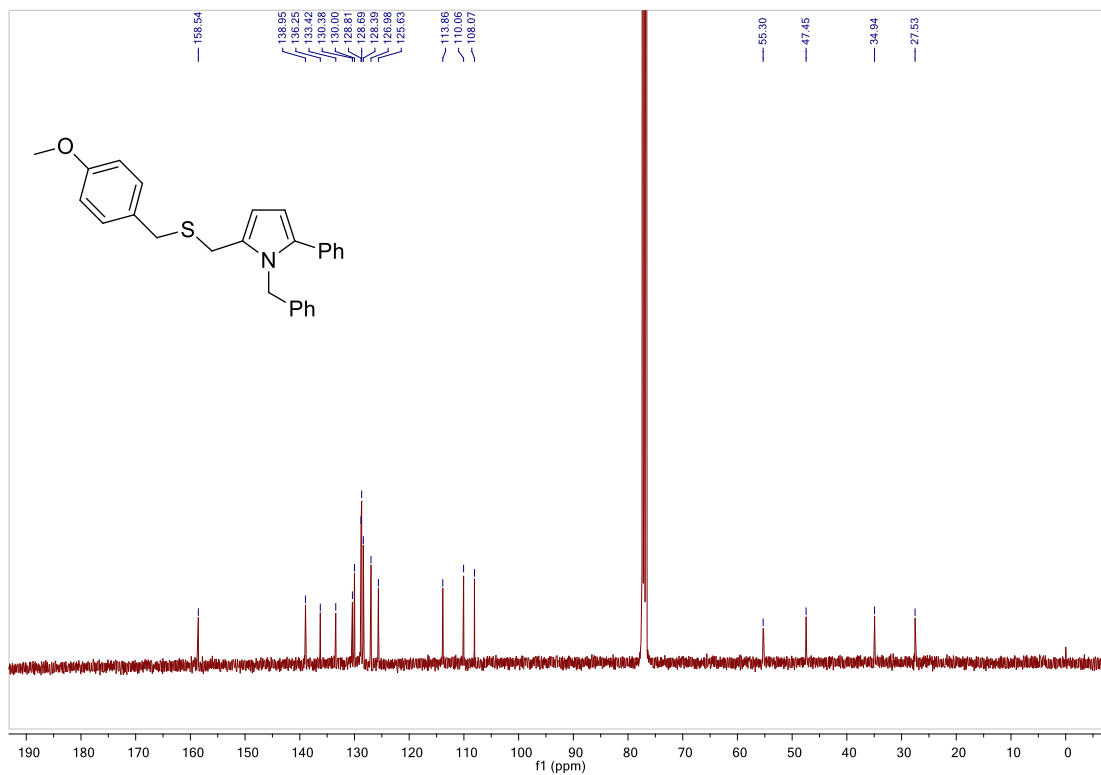

<sup>1</sup>H NMR spectrum of (R)-5-(methoxymethyl)-4-methyl-1-(1-phenylethyl)-1H-pyrrole-2-carbaldehyde (4a):

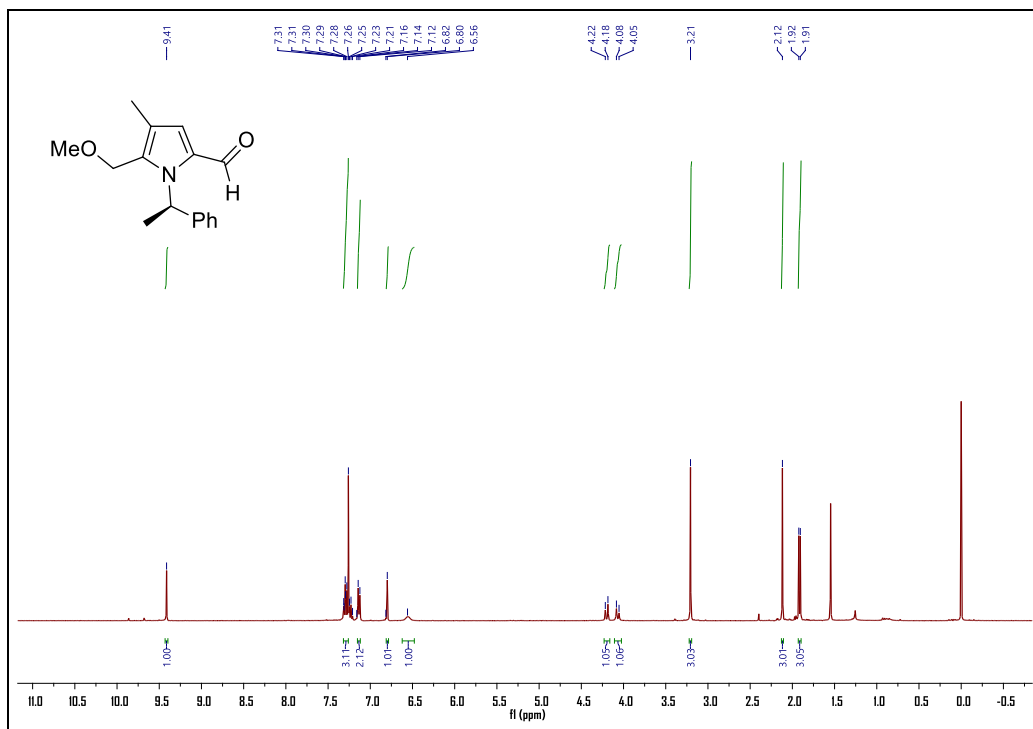

<sup>13</sup>C NMR spectrum of (R)-5-(methoxymethyl)-4-methyl-1-(1-phenylethyl)-1H-pyrrole-2-carbaldehyde (4a):

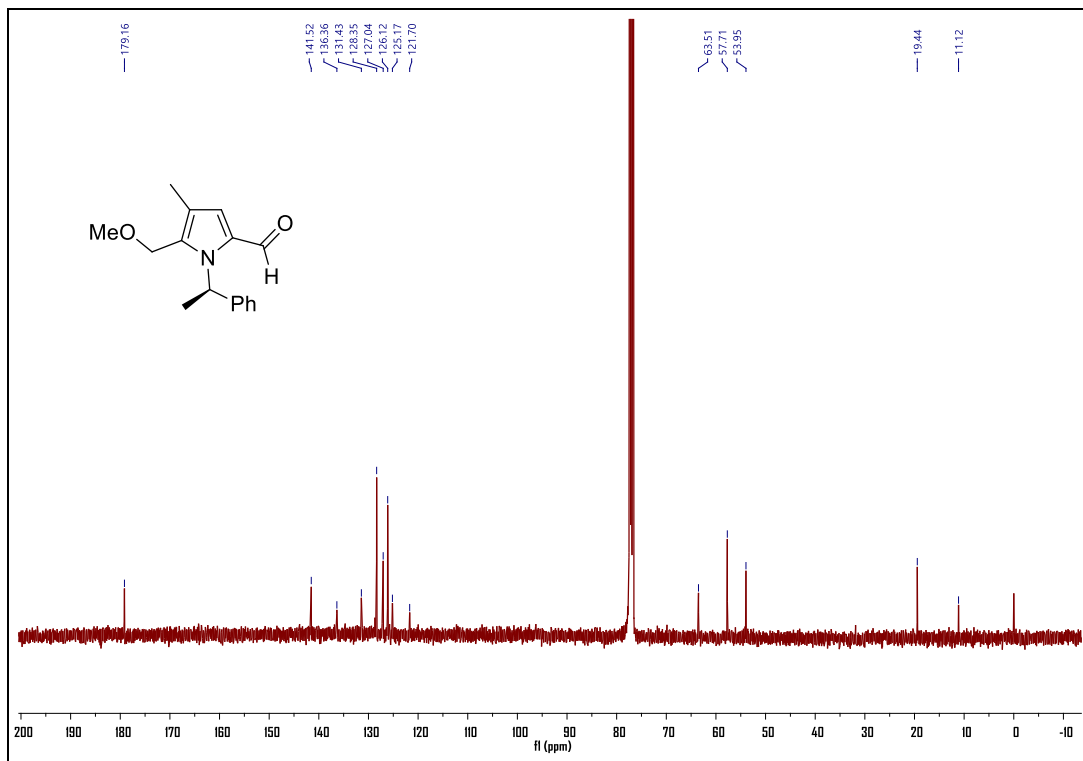

**<sup>1</sup>H NMR spectrum of (R)-5-(chloromethyl)-4-methyl-1-(1-phenylethyl)-1H-pyrrole-2-carbaldehyde (4b):**

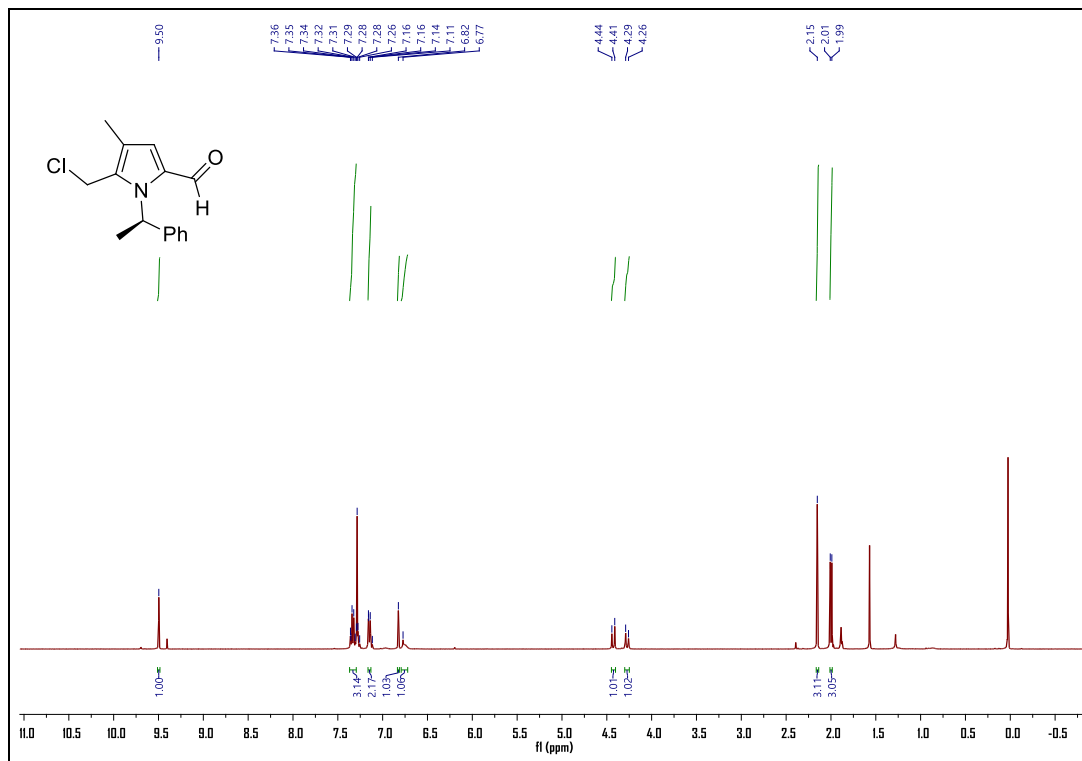

**<sup>13</sup>C NMR spectrum of (R)-5-(chloromethyl)-4-methyl-1-(1-phenylethyl)-1H-pyrrole-2-carbaldehyde (4b):**

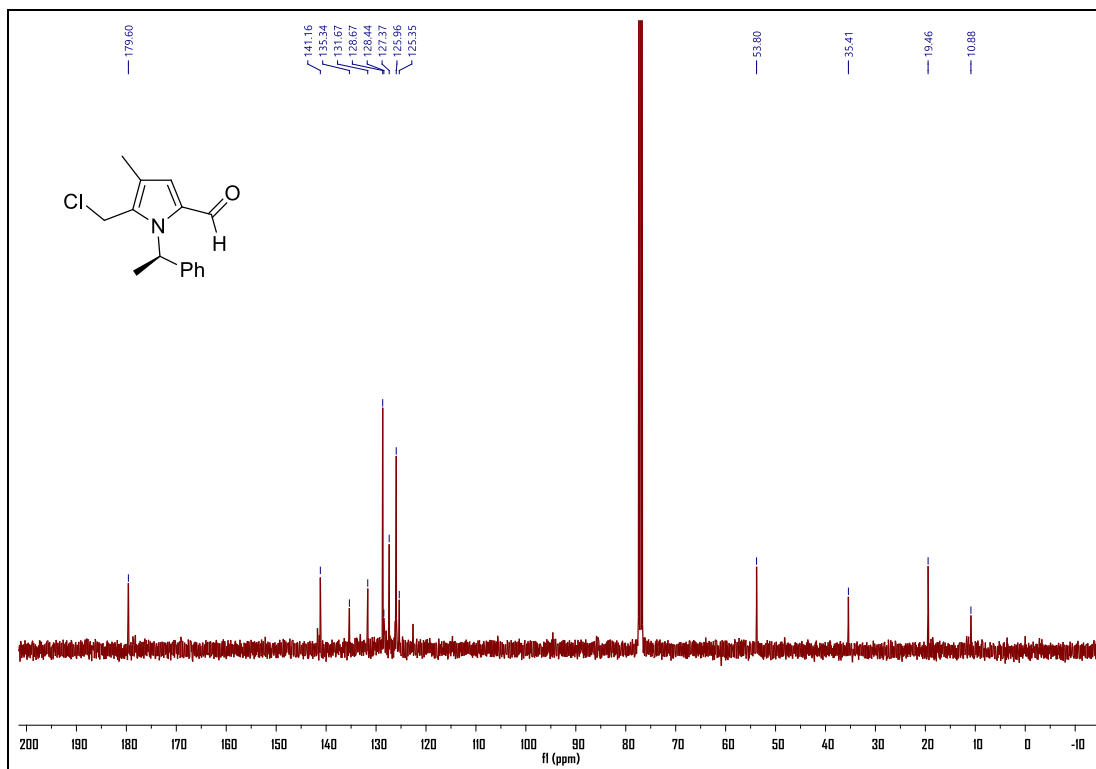

***<sup>1</sup>H NMR spectrum of (R)-(5-formyl-3-methyl-1-(1-phenylethyl)-1H-pyrrol-2-yl)methyl acetate (4c):***

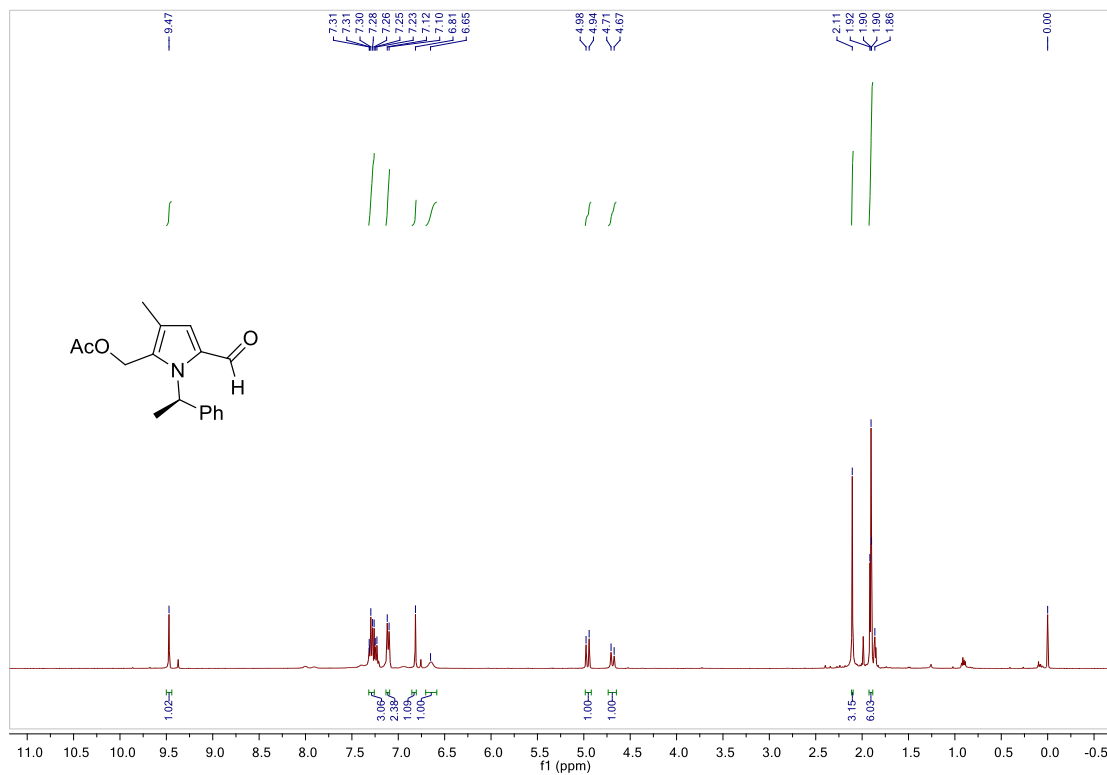

***<sup>13</sup>C NMR spectrum of (R)-(5-formyl-3-methyl-1-(1-phenylethyl)-1H-pyrrol-2-yl)methyl acetate (4c):***

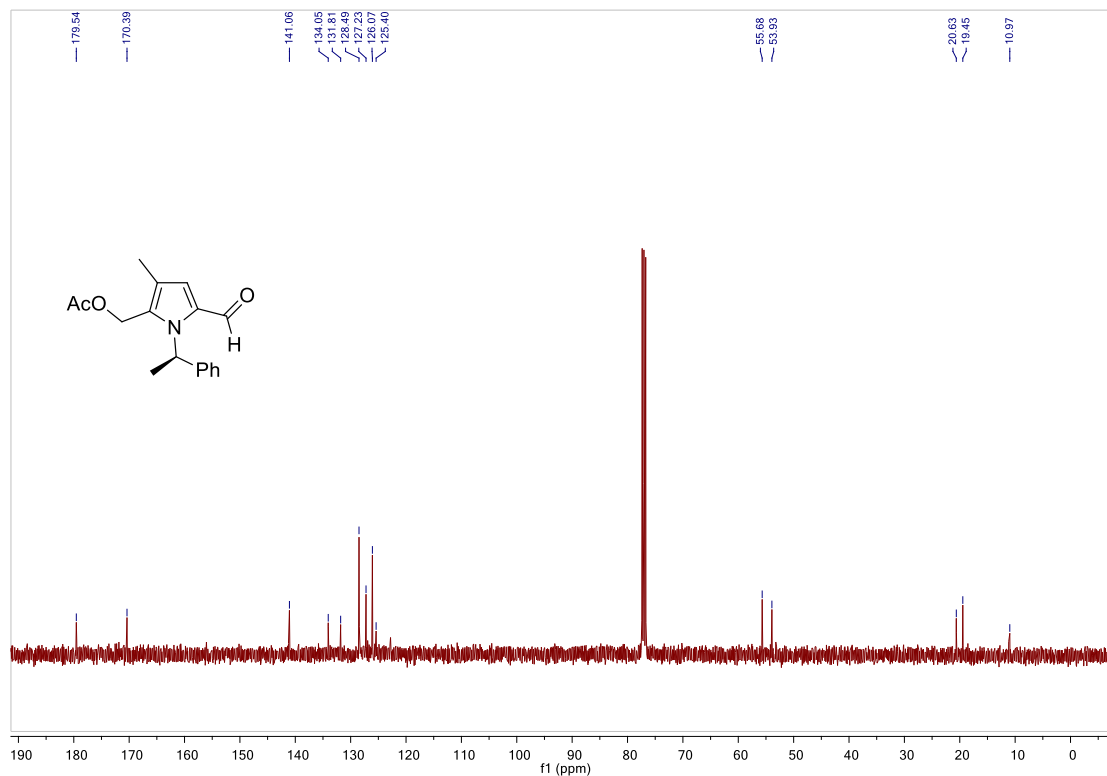

***<sup>1</sup>H* NMR spectrum of (R)-2-(5-formyl-3-methyl-1-(1-phenylethyl)-1H-pyrrol-2-yl)acetonitrile (4d):**

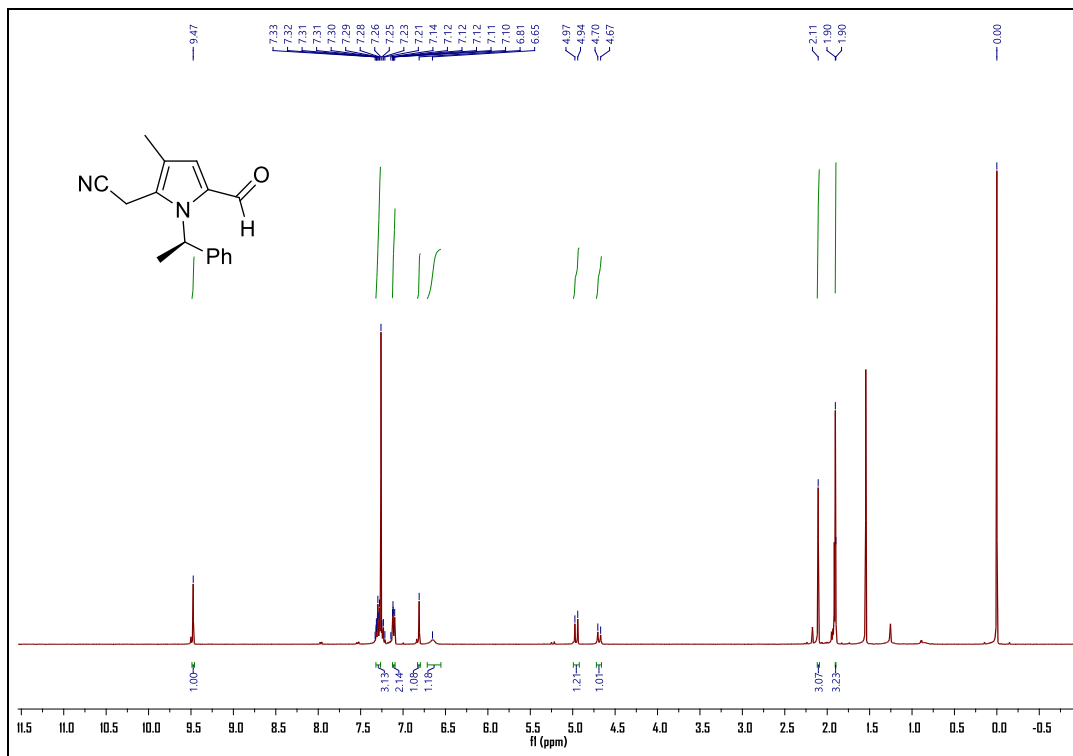

***<sup>13</sup>C* NMR spectrum of (R)-2-(5-formyl-3-methyl-1-(1-phenylethyl)-1H-pyrrol-2-yl)acetonitrile (4d):**

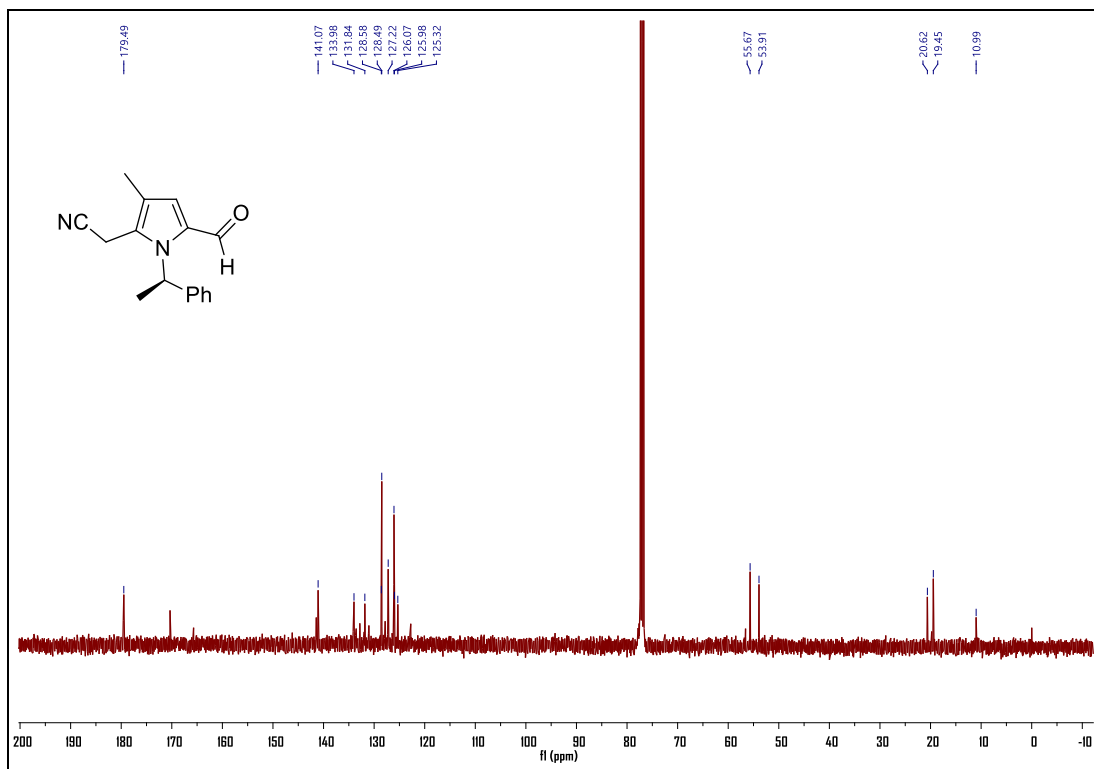

<sup>1</sup>H NMR spectrum of Ethyl 1-phenethylaziridine-2-carboxylate (11):

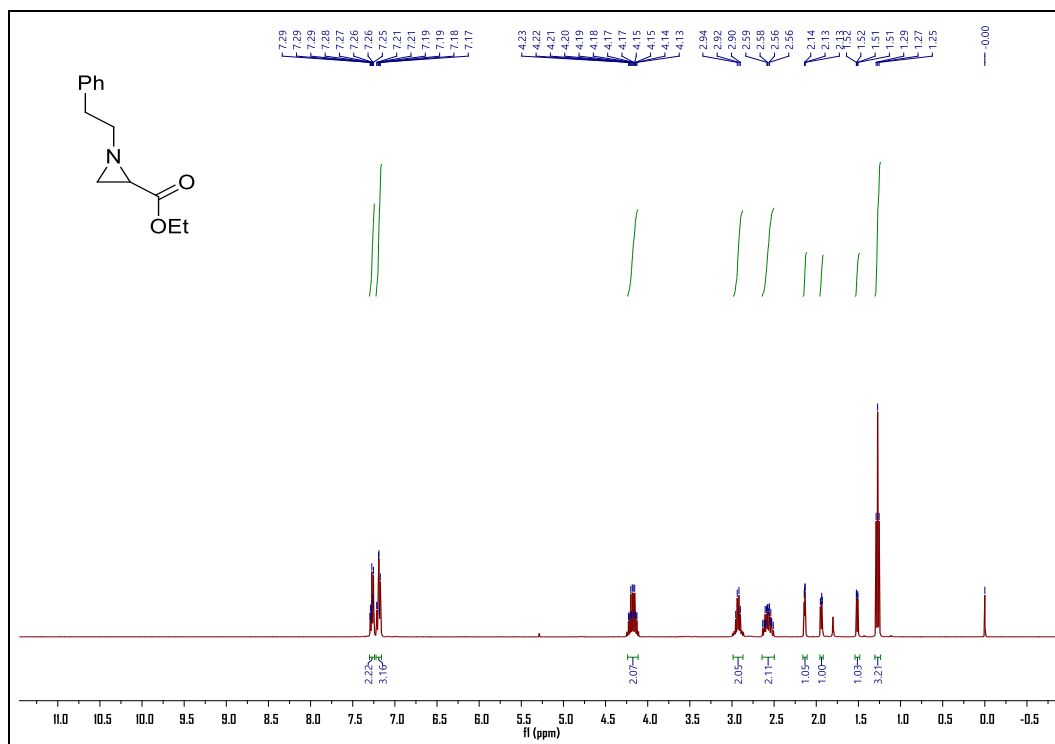

<sup>13</sup>C NMR spectrum of Ethyl 1-phenethylaziridine-2-carboxylate (11):

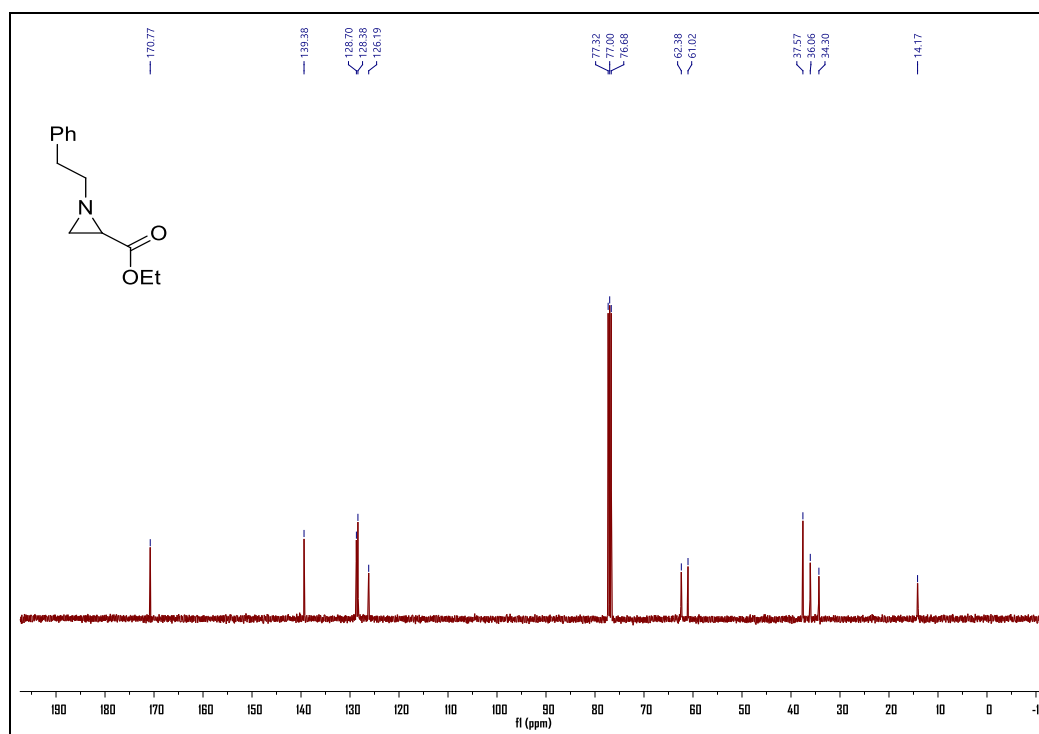

**<sup>1</sup>H NMR spectrum of *N*-methoxy-*N*-methyl-1-phenethylaziridine-2-carboxamide (12):**

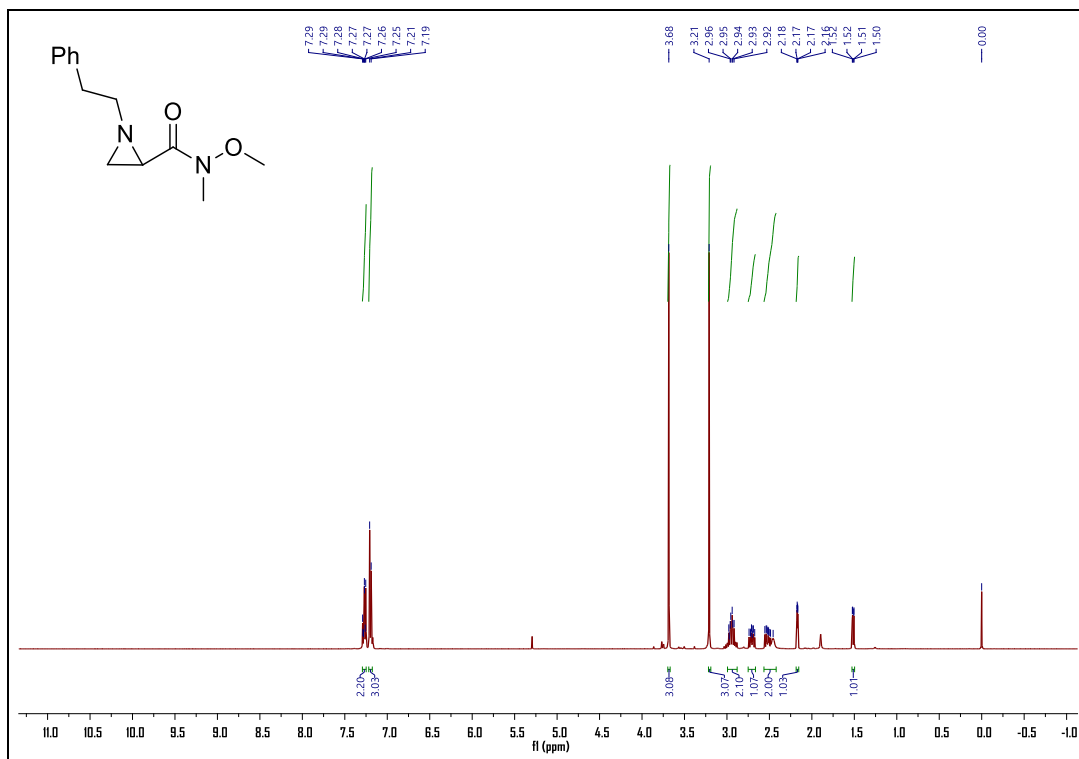

**<sup>13</sup>C NMR spectrum of *N*-methoxy-*N*-methyl-1-phenethylaziridine-2-carboxamide (12):**

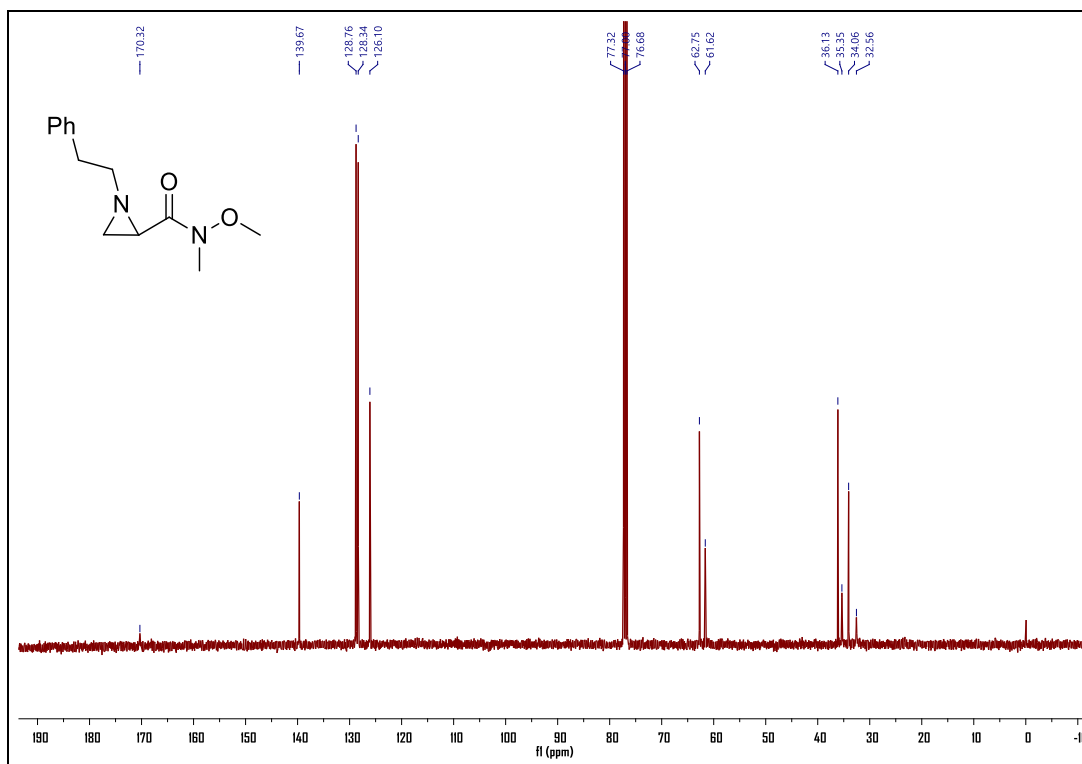

**<sup>1</sup>H NMR spectrum of 1-(1-phenethylaziridin-2-yl)but-3-en-1-ol (13):**

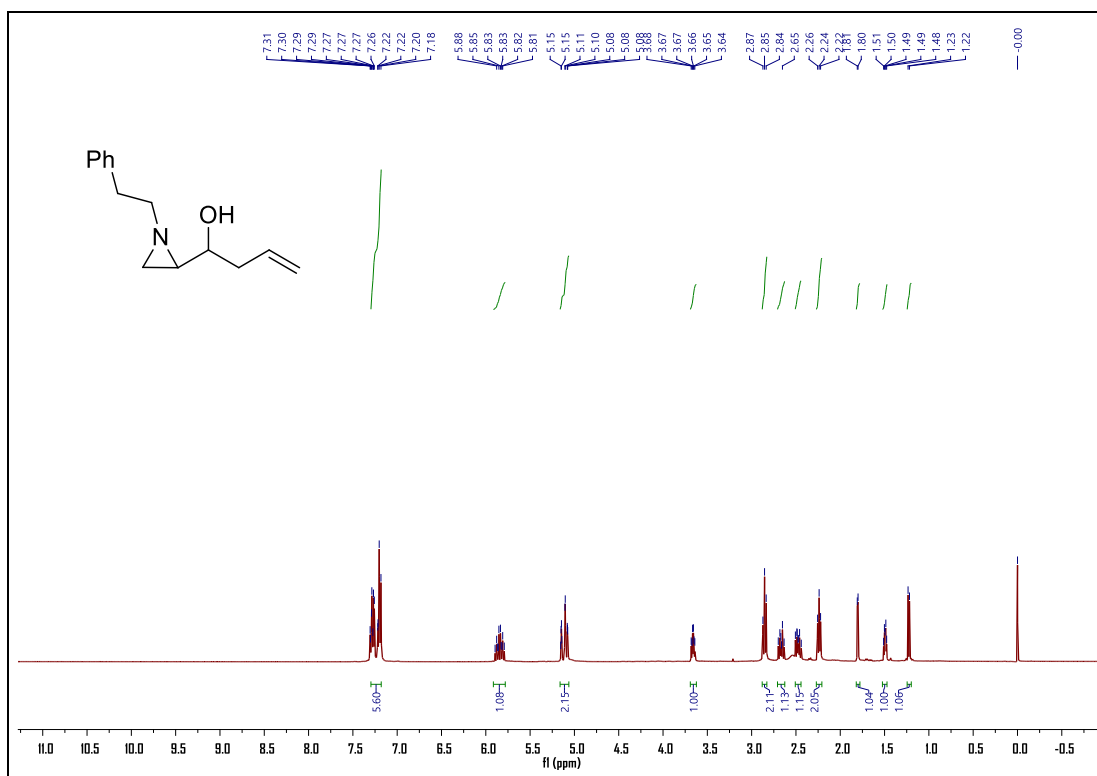

**<sup>13</sup>C NMR spectrum of 1-(1-phenethylaziridin-2-yl)but-3-en-1-ol (13):**

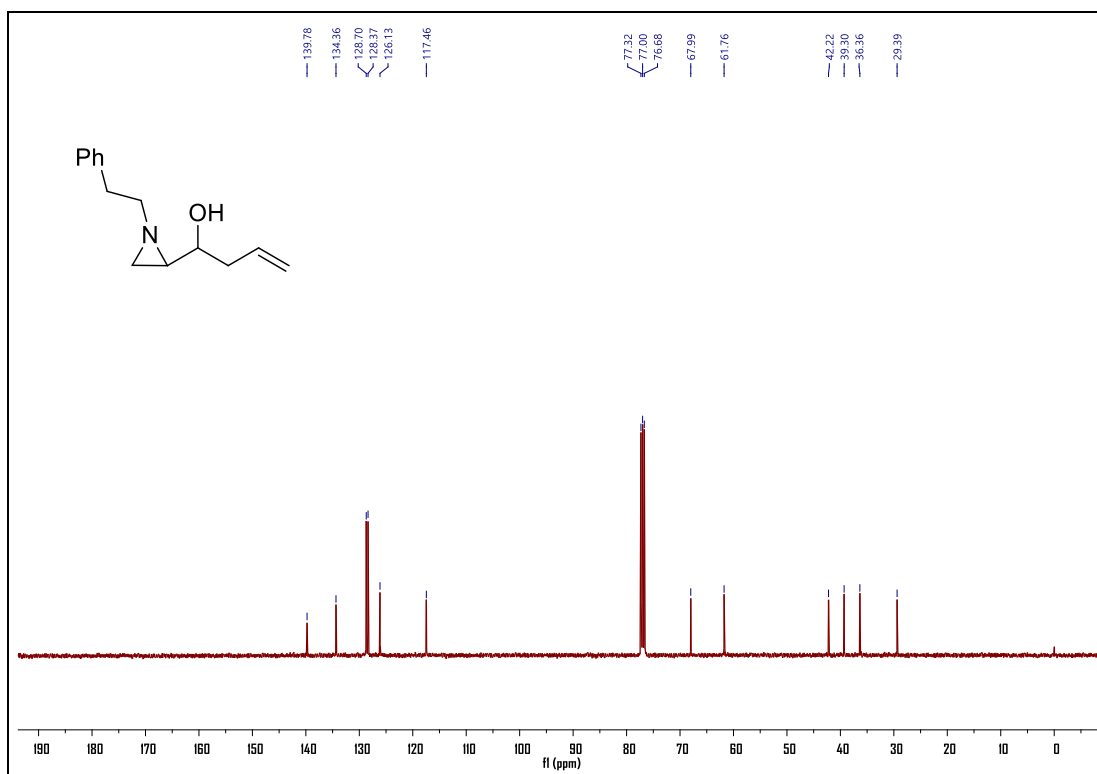

***<sup>1</sup>H NMR spectrum of 2-(1-((tert-butyldimethylsilyl)oxy)but-3-en-1-yl)-1-phenethylaziridine (14):***

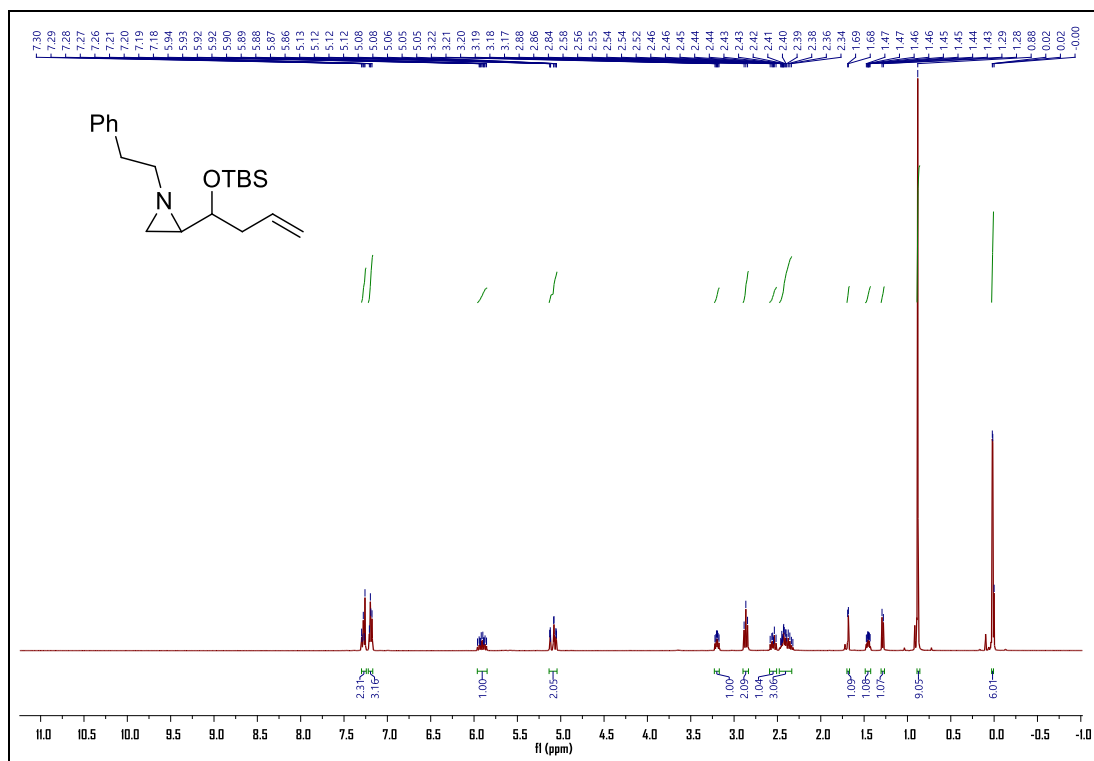

***<sup>13</sup>C NMR spectrum of 2-(1-((tert-butyldimethylsilyl)oxy)but-3-en-1-yl)-1-phenethylaziridine (14):***

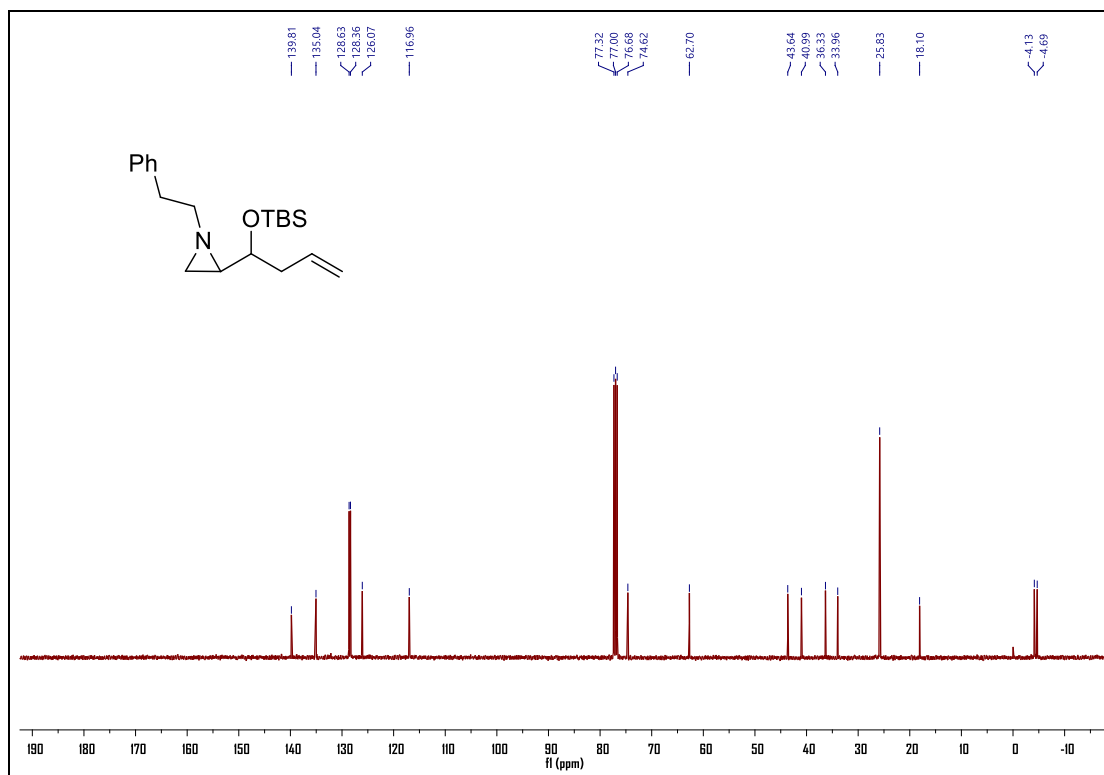

**<sup>1</sup>H NMR spectrum of Octamethyl-8-(1-phenethylaziridin-2-yl)-4,9-dioxo-3,10-disiladodecan-6-one (15):**

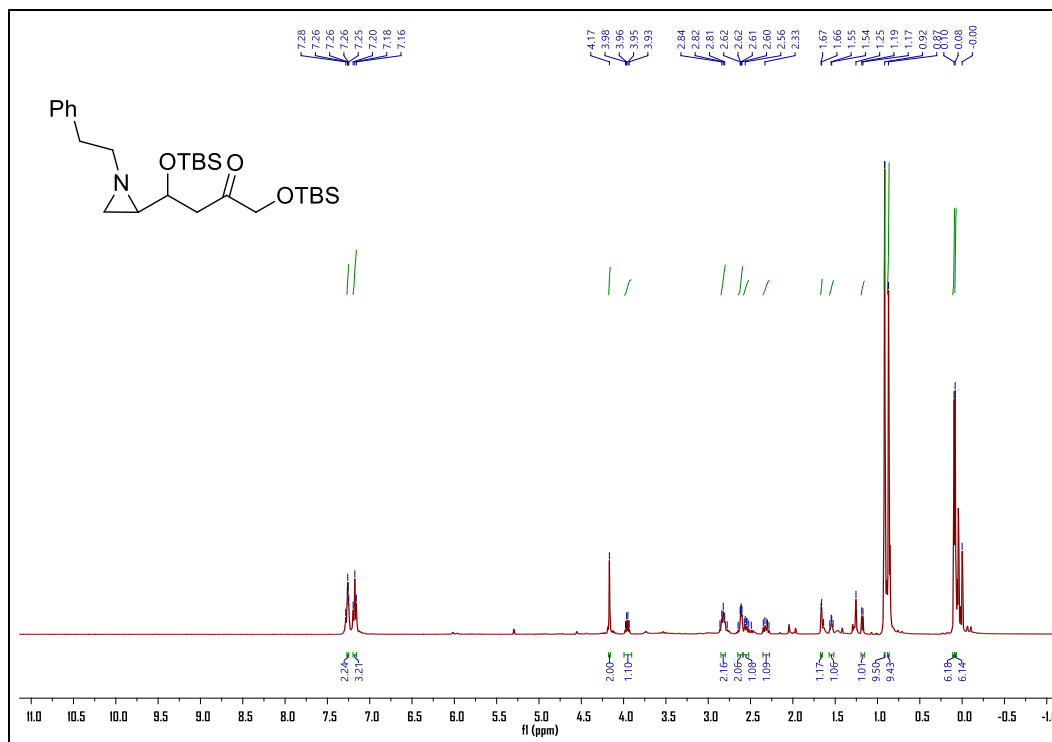

***<sup>13</sup>C NMR spectrum of Octamethyl-8-(1-phenethylaziridin-2-yl)-4,9-dioxo-3,10-disiladodecan-6-one (15):***

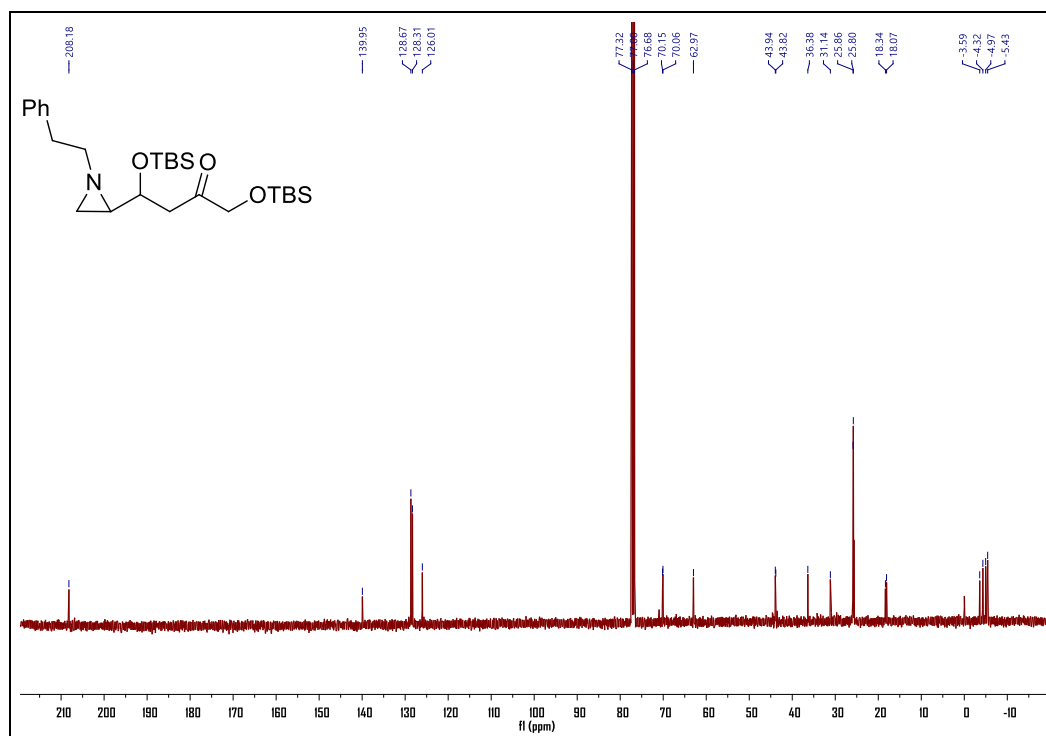

**<sup>1</sup>H NMR spectrum of (5-(((tert-butyldimethylsilyl)oxy)methyl)-1-phenethyl-1H-pyrrol-2-yl)methyl acetate (16):**

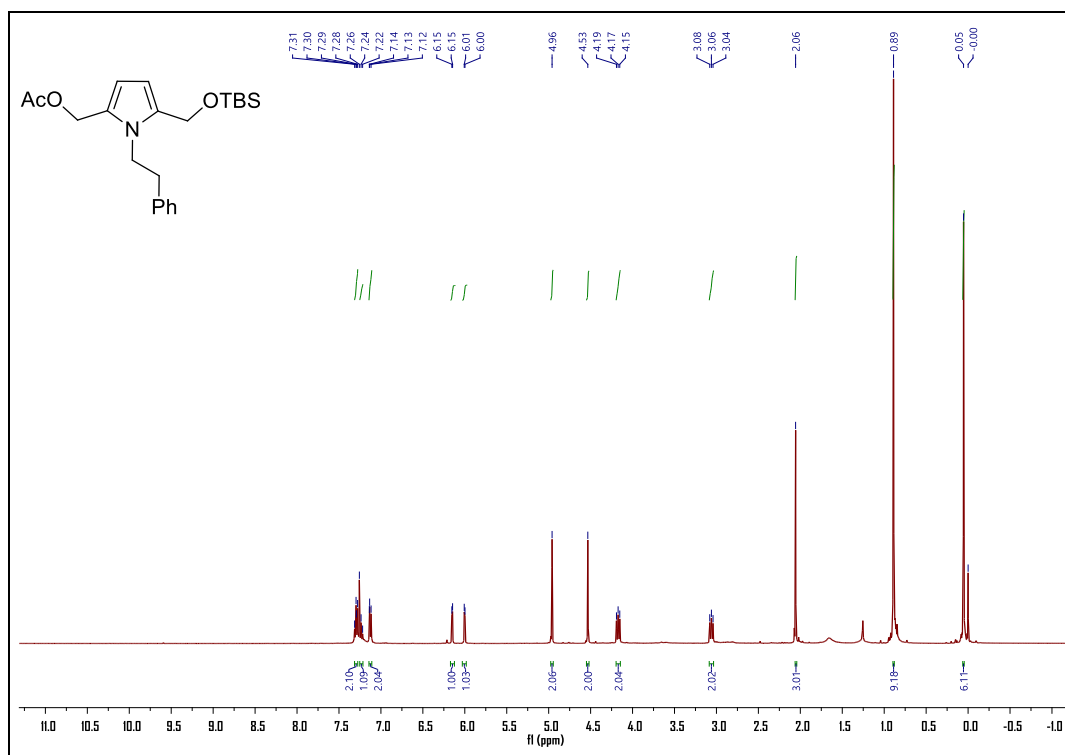

**<sup>13</sup>C NMR spectrum of (5-(((tert-butyldimethylsilyl)oxy)methyl)-1-phenethyl-1H-pyrrol-2-yl)methyl acetate (16):**

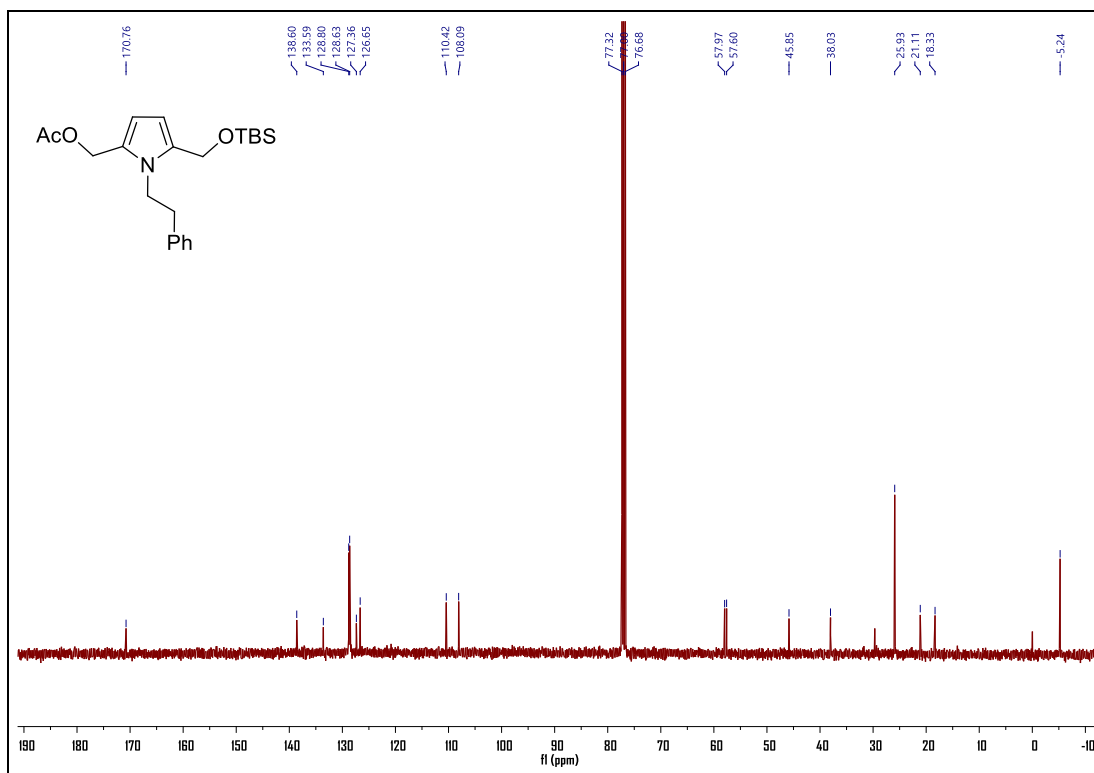

***<sup>1</sup>H NMR spectrum of (5-(((tert-butyldimethylsilyl)oxy)methyl)-1-phenethyl-1H-pyrrol-2-yl)methanol (17):***

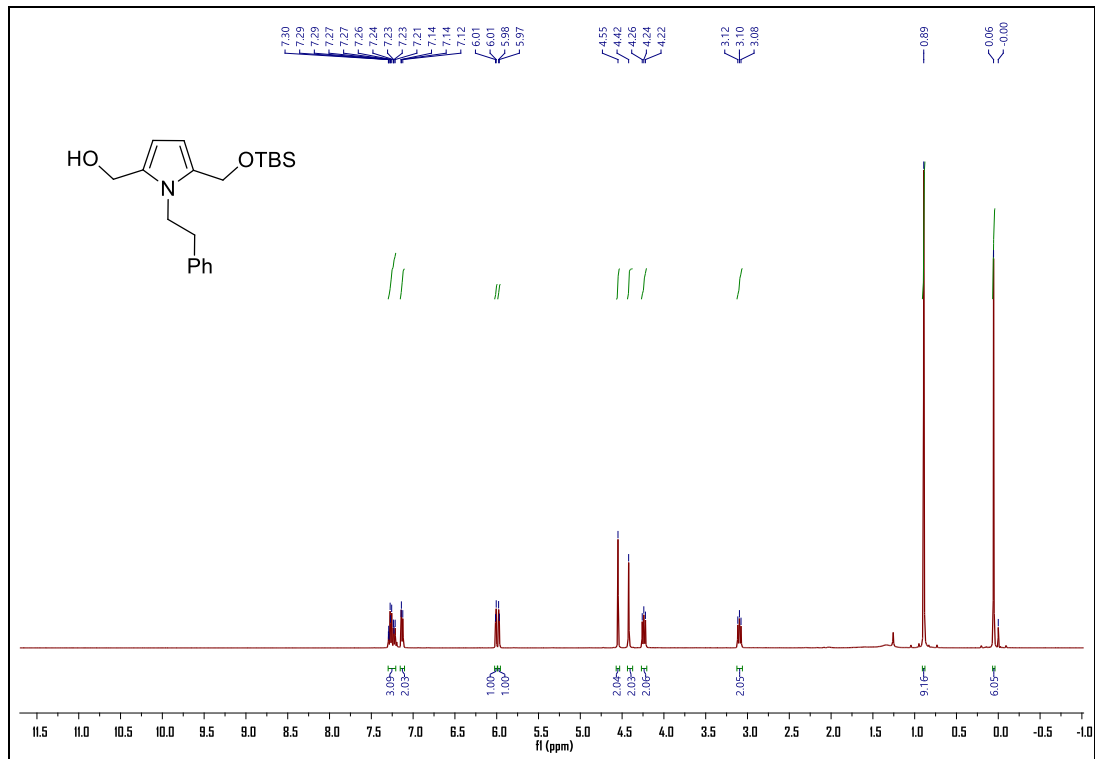

***<sup>13</sup>C NMR spectrum of (5-(((tert-butyldimethylsilyl)oxy)methyl)-1-phenethyl-1H-pyrrol-2-yl)methanol (17):***

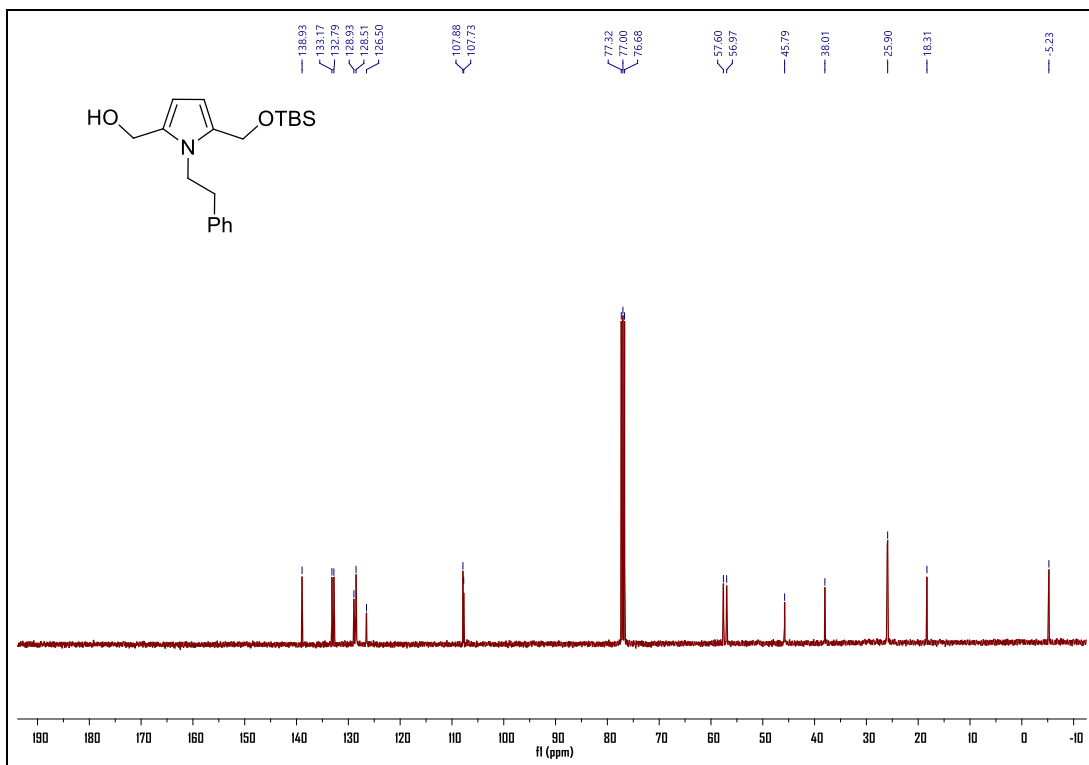

***<sup>1</sup>H NMR spectrum of 5-(((tert-butyldimethylsilyl)oxy)methyl)-1-phenethyl-1H-pyrrole-2-carbaldehyde (18):***

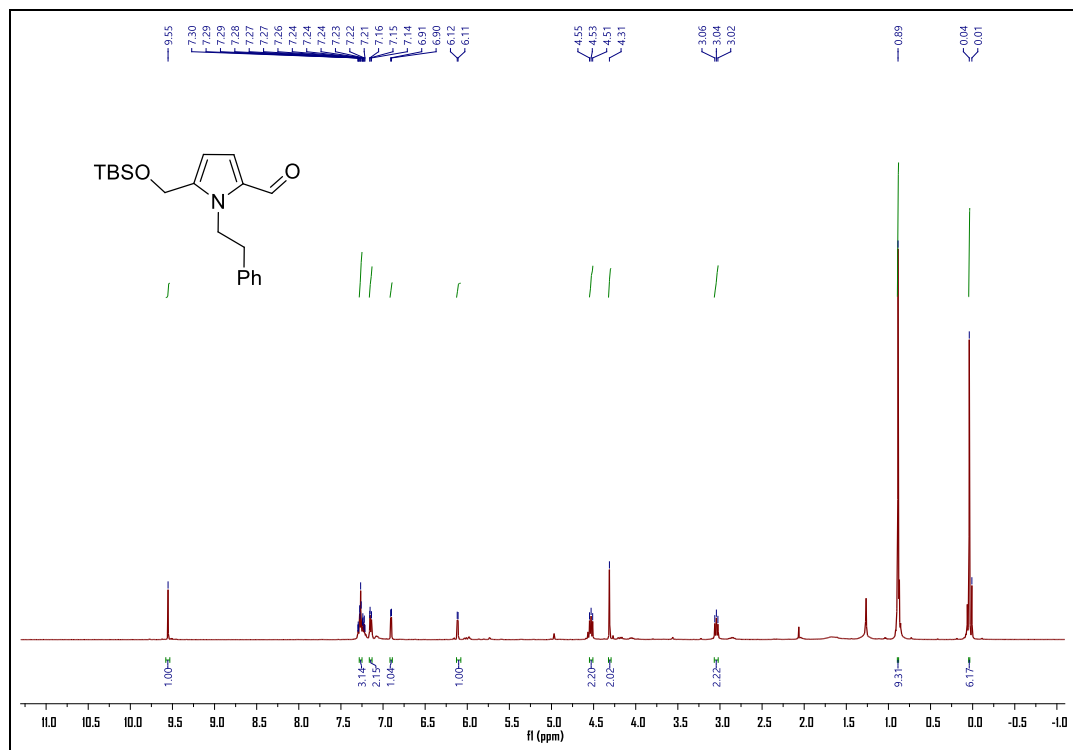

***<sup>13</sup>C NMR spectrum of 5-(((tert-butyldimethylsilyl)oxy)methyl)-1-phenethyl-1H-pyrrole-2-carbaldehyde (18):***

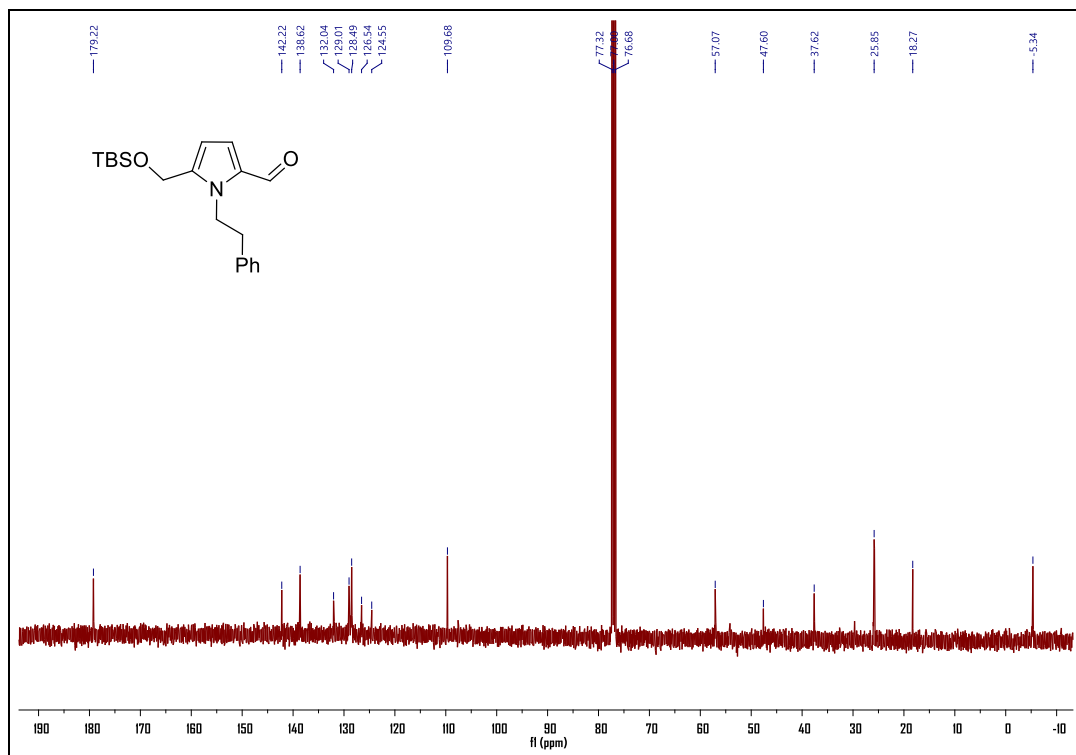

***<sup>1</sup>H NMR spectrum of 5-(hydroxymethyl)-1-phenethyl-1H-pyrrole-2-carbaldehyde (19):***

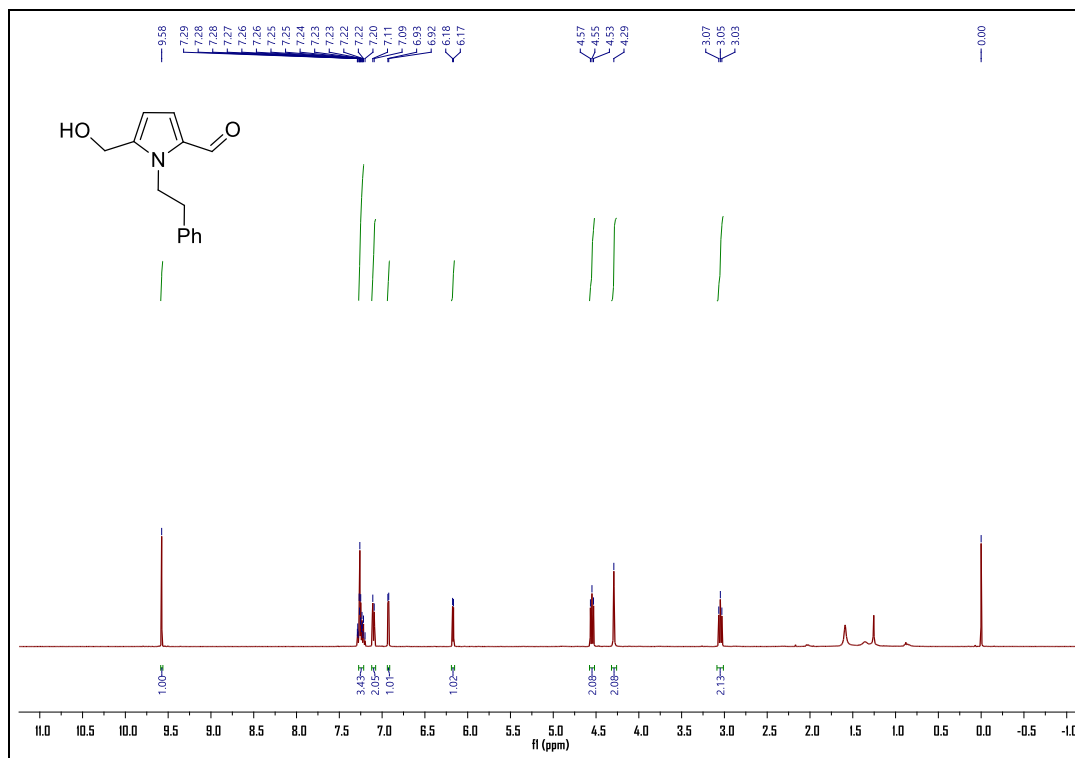

***<sup>13</sup>C NMR spectrum of 5-(hydroxymethyl)-1-phenethyl-1H-pyrrole-2-carbaldehyde (19):***

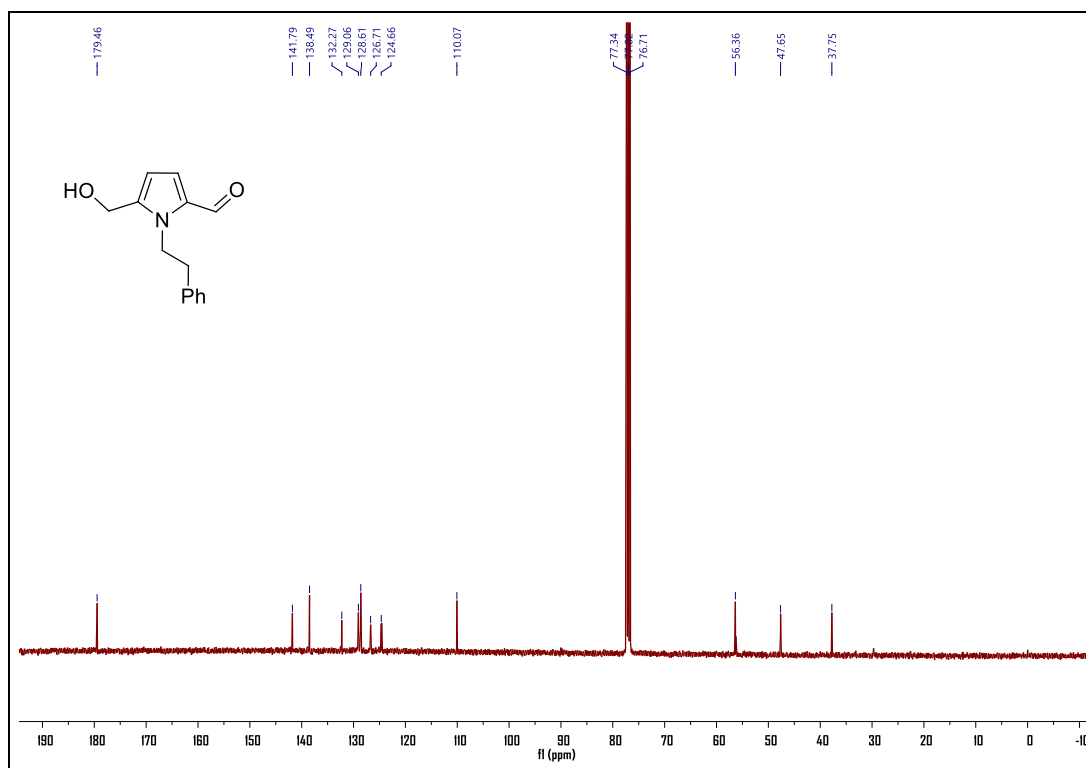

Supplement: s1 [file s1]
